# Supplementary material for: Transcriptomic and immunophenotypic profiling reveals molecular and immunological hallmarks of colorectal cancer tumourigenesis
Source: Gut. 2022 Nov 28;72(7):1326–39. doi: 10.1136/gutjnl-2022-327608 (PMC10314051; doi:10.1136/gutjnl-2022-327608)
Supplement: Supplementary data [file gutjnl-2022-327608supp002.xlsx]

## Sheet: SegmentSummary_DSP
AOI_ID	Nuclei.count	Surface.area	Sequencing.saturation	Raw.reads	Stitched.reads	Aligned.reads	Deduplicated.reads	In.Situ.Negative.median	Biological.probe.median	UMI.Q30	Tag.sequence.Q30
ESD1_001_PanCK	805	93644.6	68.0857	1940384	1937799	1828090	619260	35	53	0.961	0.9669
ESD1_001_Vimentin	1405	122773	71.0979	2605657	2602231	2455518	753090	36	65	0.9599	0.9648
ESD1_002_PanCK	571	65525.6	68.4416	1705008	1702900	1602696	538074	22.5	39	0.9616	0.9668
ESD1_002_Vimentin	616	60881.9	67.298	1198213	1195623	1124531	391840	17.5	32	0.962	0.9514
ESD1_003_PanCK	1083	128996	68.6132	3294779	3290240	3099508	1034125	37.5	68	0.9599	0.9651
ESD1_003_Vimentin	1082	79144.1	65.6688	1374687	1372941	1291595	471946	19	40	0.9601	0.9671
ESD1_004_PanCK	2503	213357	58.0217	11839667	11822841	11023147	4970094	64.5	180	0.9623	0.9628
ESD1_004_Vimentin	633	59893.1	66.1938	2024267	2021896	1891266	684327	13	38	0.959	0.9667
ESD1_005_PanCK	1366	126942	62.719	7516538	7505058	6993707	2802238	41.5	109	0.9617	0.9677
ESD1_005_Vimentin	1471	179346	65.353	4967616	4961501	4655652	1721130	45	96	0.9602	0.9658
ESD1_006_PanCK	1193	113992	61.841	4790047	4778106	4458652	1827836	34.5	82	0.9618	0.946
ESD1_006_Vimentin	1807	220202	56.768	3440218	3435470	3242092	1487275	48	91	0.9616	0.9671
ESD1_007_PanCK	955	89908.1	65.8029	4717497	4710983	4408050	1613247	32	77	0.9594	0.9651
ESD1_007_Vimentin	1848	214561	59.1798	5177594	5169674	4876424	2113505	56	114	0.9611	0.9661
ESD1_008_PanCK	1784	188650	67.9193	12408474	12392198	11577053	3980728	61	154	0.9602	0.9657
ESD1_008_Vimentin	1262	138375	68.5538	4868158	4861170	4557811	1530852	40	88	0.96	0.9651
ESD1_009_PanCK	2758	209337	56.6588	9030665	9011950	8404463	3914000	56	159	0.9626	0.955
ESD1_009_Vimentin	1383	136127	69.2803	3871332	3866615	3624784	1189263	26	69	0.9595	0.9653
ESD2_010_PanCK	366	43146.7	82.0981	2333580	2330401	2182858	417756	16	32	0.9604	0.9656
ESD2_010_Vimentin	533	57122.2	67.353	910053	908741	856986	297105	17	29	0.9608	0.966
ESD2_011_PanCK	1430	239079	58.5791	6766397	6757217	6385229	2802703	82.5	142	0.9607	0.9655
ESD2_011_Vimentin	484	41767.4	84.2602	3685236	3680599	3461761	580050	16	38	0.9595	0.965
ESD2_012_PanCK	2829	224556	60.0121	7328812	7318863	6918016	2930639	60.5	131	0.9613	0.9669
ESD2_012_Vimentin	475	36216.9	80.482	1761925	1757137	1648121	343893	8	22	0.9624	0.9433
ESD2_013_PanCK	5054	290785	55.8304	6796739	6786628	6396159	3002091	71.5	153	0.9605	0.9644
ESD2_013_Vimentin	1060	74403.7	66.826	2245537	2242623	2101797	744935	19	49	0.9611	0.9669
ESD2_014_PanCK	2665	243141	51.3636	6975689	6958809	6569186	3392726	49	128	0.9619	0.9501
ESD2_014_Vimentin	680	99536.8	68.2357	1805438	1802860	1702517	573485	16	35	0.9609	0.9658
ESD2_015_PanCK	2239	226261	60.2683	7848917	7836769	7396067	3118508	53	130	0.9611	0.9642
ESD2_015_Vimentin	1077	108436	65.0003	2532472	2529304	2377505	886357	24	56	0.9593	0.966
ESD2_016_PanCK	445	55658.2	68.7152	2496105	2492790	2337258	780902	15	35	0.9615	0.9674
ESD2_016_Vimentin	1288	291623	59.8405	2896250	2892025	2721885	1163119	34	69	0.9611	0.9664
ESD2_017_PanCK	683	82719.3	64.7189	3125948	3121825	2916824	1102870	21	50	0.9594	0.9653
ESD2_017_Vimentin	1125	212655	58.4273	2419915	2416886	2279660	1006023	26	53	0.9601	0.9652
ESD2_018_PanCK	1319	161672	65.1963	6265807	6257568	5893318	2180731	31	76	0.9601	0.9652
ESD2_018_Vimentin	871	151509	61.4294	2133446	2130298	2007683	822883	14	38	0.9615	0.9666
ESD3_001_PanCK	694	64132.2	62.3735	1692002	1687740	1581770	636641	35.5	52	0.9625	0.9462
ESD3_001_Vimentin	983	85501.7	64.547	1893577	1891008	1759069	671330	33	57	0.9613	0.9665
ESD3_002_PanCK	389	33113.8	81.0205	3046230	3042201	2865770	578160	26.5	44	0.9603	0.9662
ESD3_002_Vimentin	676	63619.9	63.0546	1496648	1494669	1399400	552942	24	45	0.961	0.9669
ESD3_003_PanCK	1613	107679	63.8311	6239892	6231081	5834132	2256898	62	124	0.9618	0.9678
ESD3_003_Vimentin	1475	91277.2	62.9012	3687676	3681980	3432438	1368084	36	87	0.9618	0.9678
ESD3_004_PanCK	3067	290253	60.2716	19275804	19248155	18021129	7657973	117	268	0.9601	0.9648
ESD3_004_Vimentin	314	24769.6	82.4153	3481554	3477402	3244168	612222	12	31	0.9611	0.9656
ESD3_005_PanCK	611	55509.2	63.8566	2336276	2333479	2189840	844410	22	48	0.9594	0.967
ESD3_005_Vimentin	3046	292878	60.4045	5396983	5389581	5071771	2136962	106	183	0.9608	0.9666
ESD3_006_PanCK	1262	118253	62.9358	6953340	6944484	6489876	2577200	54	119	0.9595	0.9669
ESD3_006_Vimentin	1758	219053	59.3453	3928565	3922689	3682149	1597145	62	114	0.9616	0.9652
ESD3_007_PanCK	2201	207678	58.2224	17137746	17113053	15944390	7159744	100.5	238	0.96	0.9658
ESD3_007_Vimentin	506	45738.9	79.0126	5494843	5487098	5106308	1153224	21	60	0.96	0.9659
ESD3_008_PanCK	989	74217.5	70.7125	5026555	5019003	4707940	1472153	35	78	0.9609	0.9673
ESD3_008_Vimentin	3054	275759	61.5743	6220866	6212462	5837709	2390413	100	193	0.9609	0.9663
ESD3_009_PanCK	2873	244961	57.321	14118506	14099656	13214681	6025637	106.5	241.5	0.9597	0.9651
ESD3_009_Vimentin	879	84253.2	100	1963786	1960973	1826148	0	1	1	0.9597	0.9658
ESD4_010_PanCK	777	82451.3	71.8052	3018856	3014790	2801571	851159	13	37	0.9615	0.9672
ESD4_010_Vimentin	1499	115809	67.1726	1160069	1158578	1078538	380820	7	26	0.9595	0.9649
ESD4_011_PanCK	2261	189739	65.1729	5826913	5818778	5481920	2029343	31	92	0.962	0.9671
ESD4_011_Vimentin	812	68230.1	68.2147	1052260	1050822	983394	334464	7	23	0.9613	0.9671
ESD4_012_PanCK	2758	222163	59.9044	5769644	5760931	5418207	2313374	31	99	0.9608	0.9644
ESD4_012_Vimentin	655	44393	79.0778	1406438	1404568	1312449	294258	5	19	0.9615	0.9673
ESD4_013_PanCK	2789	221894	55.4813	9429378	9418217	8847349	4197841	43	140	0.9585	0.9662
ESD4_013_Vimentin	495	41436.5	80.9504	4407462	4401411	4127784	839603	10	41	0.9619	0.9674
ESD4_014_PanCK	2487	191605	59.6411	9527269	9514003	8942732	3845099	44	138	0.9606	0.9669
ESD4_014_Vimentin	733	50886.5	81.8206	4651416	4642446	4374855	845600	12	42.5	0.9605	0.9609
ESD4_015_PanCK	309	96194.4	63.7035	3650302	3645200	3432142	1324933	19	58	0.9621	0.9681
ESD4_015_Vimentin	123	111612	63.8695	3024621	3020748	2861162	1092811	17	46	0.96	0.9653
ESD4_016_PanCK	202	73164.3	66.3589	2809541	2806017	2637616	945160	13	41	0.9602	0.9659
ESD4_016_Vimentin	102	95413.8	64.5432	2342200	2339200	2209031	830470	13	37	0.9602	0.9652
ESD4_017_PanCK	2694	213154	54.993	6744008	6735156	6350592	3035274	44	120	0.9601	0.9658
ESD4_017_Vimentin	565	34592	79.6428	2122395	2119760	1990597	432060	8	27	0.9601	0.9669
ESD4_018_PanCK	1752	154185	64.7203	6296668	6288159	5912809	2221446	44	100	0.9601	0.9651
ESD4_018_Vimentin	1229	92059.7	64.3445	1407794	1406012	1321680	501956	16.5	38	0.9596	0.9657
ESD5_001_PanCK	423	43622.5	78.9458	3375699	3370269	3166927	710725	25	49	0.9614	0.9644
ESD5_001_Vimentin	174	14942.4	80.4934	954358	953150	896331	186163	9	16	0.9616	0.9664
ESD5_002_PanCK	773	74646.4	63.2999	2378379	2375267	2228971	872868	37	64	0.9596	0.9649
ESD5_002_Vimentin	655	53860.6	64.5875	1297665	1295857	1212557	459535	19	39	0.9601	0.9657
ESD5_003_PanCK	3038	225319	57.7438	10099372	10084942	9466127	4267607	80.5	190	0.9593	0.9664
ESD5_003_Vimentin	821	78607.3	66.3472	2809211	2805296	2557291	945377	29	62	0.9606	0.9658
ESD5_004_PanCK	2242	159872	60.2935	11781357	11756669	11059131	4677967	64	190	0.961	0.9509
ESD5_004_Vimentin	774	74041.8	64.9984	3839233	3833866	3605989	1343794	20	69	0.9602	0.9653
ESD5_005_PanCK	1332	100217	64.4499	7523486	7513044	7053465	2674606	40	114	0.9602	0.9657
ESD5_005_Vimentin	381	44793.8	74.0923	2821390	2816290	2624698	730958	15	40	0.9614	0.9598
ESD5_006_PanCK	1999	150769	60.0451	9444014	9429673	8886916	3773343	51	146	0.9613	0.965
ESD5_006_Vimentin	626	56269.7	63.5737	2901652	2897615	2725489	1056965	15	55	0.9616	0.9681
ESD5_007_PanCK	1785	183695	67.06	8871806	8859973	8246317	2922372	89	177	0.9614	0.9666
ESD5_007_Vimentin	756	58878.5	60.485	1358845	1355608	1258971	536947	19	42	0.9615	0.9471
ESD5_008_PanCK	1519	132983	66.8141	11299789	11285240	10618281	3749938	55	153	0.959	0.9652
ESD5_008_Vimentin	956	126882	63.3503	5788416	5781212	5425921	2121435	36	105	0.9593	0.9654
ESD5_009_PanCK	1268	89007.6	61.5312	6474476	6467217	6093758	2490652	37	106	0.9606	0.9646
ESD5_009_Vimentin	760	67021.3	66.157	3367523	3362942	3155478	1139671	22	62	0.9606	0.9663
ESD6_001_PanCK	864	68592.9	81.5875	5130978	5014540	4750479	944743	30.5	62	0.9934	0.9933
ESD6_001_Vimentin	1208	131001	82.0644	4852365	4809688	4544266	870299	38	67	0.9933	0.9933
ESD6_002_PanCK	2309	168877	79.6361	22664068	22453879	21248020	4615291	85	190	0.9935	0.9933
ESD6_003_PanCK	3074	350198	79.8289	58743136	58165496	55078757	11849118	186	388	0.9931	0.9929
ESD6_003_Vimentin	334	63430.4	81.088	5626911	5569416	5260702	1064161	22	54	0.9929	0.9933
ESD6_004_PanCK	3035	341179	81.9999	50250679	49562658	46876157	9045182	127.5	299	0.9931	0.9929
ESD6_004_Vimentin	530	76422.4	78.6192	5957735	5688359	5355374	1273809	19.5	58	0.9934	0.9931
ESD6_005_PanCK	2059	185249	81.6051	29629252	29340831	27718073	5450274	75	193	0.9933	0.993
ESD6_005_Vimentin	2401	274434	81.5197	21334712	21142910	19903896	3942711	66	174	0.9933	0.9932
ESD6_006_PanCK	1843	199878	75.5715	19322306	18816489	17743679	4720145	77	177	0.9932	0.9931
ESD6_006_Vimentin	1569	238111	78.9163	15199591	14998196	14028526	3204643	69.5	144	0.9932	0.9931
ESD6_007_PanCK	2298	215227	78.8357	27788657	27511150	25979642	5881262	102	231	0.993	0.9931
ESD6_007_Vimentin	1857	202102	82.2373	13112700	12993001	12237183	2329176	58	129	0.9934	0.9934
ESD6_008_PanCK	1094	118005	78.8851	10985499	10468703	9865789	2319574	44	99	0.9934	0.9927
ESD6_008_Vimentin	2460	284797	81.8004	20909553	20740995	19443105	3805458	83	177	0.9949	0.9949
ESD6_009_PanCK	702	84290.4	80.8792	6154065	6101377	5761222	1176706	30	62	0.9931	0.9931
ESD6_009_Vimentin	2024	271318	78.0463	10847099	10745706	10139284	2381339	76	134	0.9932	0.9929
ESD7_010_PanCK	648	98744.9	67.1875	3136717	3132696	2870846	1029236	21	55	0.9614	0.9668
ESD7_010_Vimentin	267	18828.3	80.2273	661332	660488	613599	130763	3	9	0.9613	0.9672
ESD7_011_PanCK	555	91748	46.7921	1034170	1031094	968770	550260	12	29	0.9631	0.9372
ESD7_011_Vimentin	168	23671	79.0211	809909	808149	758090	169910	6	14	0.962	0.9558
ESD7_012_PanCK	1463	169983	62.5018	3627866	3622999	3421324	1360383	44	91	0.9595	0.9649
ESD7_012_Vimentin	1009	104244	65.1394	1707032	1704826	1603803	595081	25	51	0.9599	0.965
ESD7_013_PanCK	2188	219724	59.3987	4389694	4382548	4136152	1782273	48	112	0.9609	0.9655
ESD7_013_Vimentin	689	52894.5	55.9294	648328	647253	607497	285722	9	23	0.961	0.962
ESD7_014_PanCK	1897	188602	62.8711	4464737	4452030	4181447	1657708	44	100	0.9629	0.9421
ESD7_014_Vimentin	743	68013.4	67.5193	1051142	1049571	990368	341418	14	30	0.9615	0.9668
ESD7_015_PanCK	3592	276348	57.7738	11268797	11253357	10570167	4758388	76	211	0.9596	0.9649
ESD7_015_Vimentin	400	41131.2	83.2714	3182893	3178948	2984252	532453	11	31	0.9607	0.9657
ESD7_016_PanCK	957	94945.9	69.2826	3756726	3751630	3527838	1153968	33	77	0.9619	0.9679
ESD7_016_Vimentin	756	101066	68.7755	2301700	2298569	2168586	718694	23	50	0.9616	0.9678
ESD7_017_PanCK	2445	239604	100	7640825	7630281	7170874	0	1	1	0.9591	0.964
ESD7_017_Vimentin	1064	85261.4	67.5992	2168157	2165416	2045304	702501	24	55	0.9591	0.9646
ESD7_018_PanCK	2178	211559	55.8649	8432873	8419479	7896316	3721859	54	152	0.9602	0.9658
ESD7_018_Vimentin	169	17353.7	82.6183	1463993	1462067	1375572	254467	6	16	0.9593	0.9653
ESD8_010_PanCK	657	56190.2	87.8188	710350	703562	672316	86529	5	9	0.9932	0.9931
ESD8_010_Vimentin	941	80504.2	82.3601	379809	376200	360022	66998	5	7	0.9935	0.9934
ESD8_011_PanCK	751	67466.1	79.5927	468338	463618	443549	95575	7.5	10	0.9932	0.9931
ESD8_011_Vimentin	826	97395.9	65.867	218768	204177	194570	74672	6	8	0.9936	0.9923
ESD8_012_PanCK	1837	211890	78.9689	3778522	3605433	3389161	794664	28	47	0.9931	0.9929
ESD8_012_Vimentin	440	40906.3	85.7873	863197	854330	807685	122684	5	10	0.9932	0.9931
ESD8_013_PanCK	3604	329564	78.3332	15782016	15636486	14725145	3419463	51	135	0.9932	0.993
ESD8_013_Vimentin	388	46484.4	88.5941	2433930	2410859	2262912	277611	5	15	0.993	0.9928
ESD8_014_PanCK	1226	175025	72.3209	3140715	3094096	2911048	869321	22	47	0.9931	0.993
ESD8_014_Vimentin	995	162091	76.4775	2961509	2812587	2674452	696621	16	32	0.9936	0.9927
ESD8_015_PanCK	2139	228788	81.2349	14278086	14141404	13344856	2679298	44	112.5	0.9927	0.9928
ESD8_015_Vimentin	1012	132604	79.6142	3573979	3542643	3337737	728584	14	39	0.9931	0.993
ESD8_016_PanCK	682	88898.3	81.549	4094418	4057557	3818534	755463	18	39	0.9934	0.9933
ESD8_016_Vimentin	2094	308859	83.2272	8473371	8393243	7966837	1421222	32	63	0.993	0.9932
ESD8_017_PanCK	1625	152802	81.2801	7225554	7154750	6758180	1352614	34	74	0.9932	0.9934
ESD8_017_Vimentin	1381	229000	81.4442	4539789	4496385	4259045	842393	25	47	0.9926	0.9927
ESD8_018_PanCK	2517	281107	82.057	20377156	20202704	19036384	3656264	58	136	0.9934	0.9932
ESD8_018_Vimentin	520	75314.6	77.2973	2202013	2180092	2057600	499917	9	25	0.9929	0.9931
