# Supplementary material for: Transcriptomic and immunophenotypic profiling reveals molecular and immunological hallmarks of colorectal cancer tumourigenesis
Source: Gut. 2022 Nov 28;72(7):1326–39. doi: 10.1136/gutjnl-2022-327608 (PMC10314051; doi:10.1136/gutjnl-2022-327608)
Supplement: Supplementary data [file gutjnl-2022-327608supp006.xlsx]

## Sheet: Vimentin_ANOVA_between_types
Gene	p_value	FDR
PDGFRB	4.60429e-17	4.60301e-14
THY1	5.04439e-17	4.60301e-14
ADH1B	2.53834e-14	1.13524e-11
ADH1A	2.73096e-14	1.13524e-11
SFRP1	3.70645e-14	1.13524e-11
MUC4	4.6288e-14	1.13524e-11
TPM4	4.90406e-14	1.13524e-11
L1CAM	4.97638e-14	1.13524e-11
COL1A1	6.05456e-14	1.22773e-11
SERPINH1	1.26057e-13	2.30054e-11
ADH1C	1.48936e-13	2.47099e-11
RUNX1	1.71823e-13	2.61314e-11
LRRC32	2.28875e-13	3.21305e-11
COL6A3	3.22006e-13	4.0795e-11
NOTCH3	3.67603e-13	4.0795e-11
ZEB1	3.74014e-13	4.0795e-11
SFRP4	3.80009e-13	4.0795e-11
MFGE8	4.30776e-13	4.36759e-11
ITGB1	6.83796e-13	6.56804e-11
COL1A2	9.63551e-13	8.79241e-11
SFRP2	1.73818e-12	1.39115e-10
FAP	1.74238e-12	1.39115e-10
IFITM1	1.75323e-12	1.39115e-10
KIT	2.36478e-12	1.79822e-10
PCK1	3.25436e-12	2.30178e-10
TGFB3	3.35402e-12	2.30178e-10
LEF1	3.40544e-12	2.30178e-10
COL5A1	3.58977e-12	2.30178e-10
FGFR2	3.65762e-12	2.30178e-10
PLOD2	3.82826e-12	2.32886e-10
TGFBR1	4.75681e-12	2.73841e-10
ITGB7	4.88688e-12	2.73841e-10
FCRL2	4.95165e-12	2.73841e-10
OLFML2B	5.17908e-12	2.77995e-10
TP53	6.10368e-12	3.18263e-10
COL5A2	6.5369e-12	3.31326e-10
COL11A1	6.79275e-12	3.31326e-10
GPT	6.89885e-12	3.31326e-10
SIGLEC8	7.10368e-12	3.32416e-10
GNG7	8.56922e-12	3.90971e-10
COL3A1	9.78616e-12	4.35603e-10
CCND1	1.14073e-11	4.95674e-10
THBS1	1.29538e-11	5.49782e-10
PML	1.38867e-11	5.72343e-10
FAM30A	1.41126e-11	5.72343e-10
CTNNB1	1.63108e-11	6.47113e-10
ITGA1	1.78454e-11	6.92932e-10
SOX10	1.89001e-11	7.06012e-10
CTSG	1.89559e-11	7.06012e-10
INHBA	2.22851e-11	8.13405e-10
C7	2.68609e-11	9.61198e-10
GATA1	4.4801e-11	1.57234e-09
MLPH	4.809e-11	1.65593e-09
ADAM12	5.54985e-11	1.87564e-09
FZD5	5.97401e-11	1.98228e-09
MMP11	6.40392e-11	2.08699e-09
SPRED1	7.00125e-11	2.24163e-09
BMP6	8.38818e-11	2.63938e-09
H3-3A	9.6691e-11	2.99087e-09
COL4A3	9.87887e-11	3.00482e-09
RAC1	1.06599e-10	3.18924e-09
WNT10A	1.28066e-10	3.76968e-09
TPM1	1.4224e-10	4.12044e-09
ITGAV	1.49747e-10	4.27013e-09
CD79B	1.63715e-10	4.55052e-09
MAP3K20	1.64567e-10	4.55052e-09
PDPN	1.68383e-10	4.58656e-09
ACTB	1.85378e-10	4.97523e-09
TRGC1/2	1.92444e-10	5.09e-09
PSAT1	2.00809e-10	5.23537e-09
TUBB	2.06623e-10	5.31109e-09
SERPING1	2.10356e-10	5.33195e-09
TWIST2	2.30989e-10	5.74175e-09
VCAN	2.32816e-10	5.74175e-09
NGFR	2.52045e-10	6.13309e-09
C1R	2.58543e-10	6.20843e-09
HSD17B8	2.65625e-10	6.29567e-09
LRP1	2.7931e-10	6.53514e-09
ESR1	3.09515e-10	7.15019e-09
TNR	3.15502e-10	7.19738e-09
PSEN2	3.48976e-10	7.86273e-09
SLAMF1	3.61937e-10	8.05531e-09
IL12A	3.86757e-10	8.504e-09
TNFRSF13B	4.05568e-10	8.81144e-09
PKM	4.3775e-10	9.39874e-09
CD276	4.70098e-10	9.97591e-09
TGFB1	6.74875e-10	1.41569e-08
SOX2	7.03359e-10	1.45867e-08
CTSW	7.14431e-10	1.46498e-08
COMP	7.47153e-10	1.51506e-08
PRKAA2	7.92038e-10	1.58843e-08
BNIP3	8.05695e-10	1.59825e-08
FGF11	8.16247e-10	1.60178e-08
CCR2	8.42101e-10	1.63023e-08
CDH11	8.54619e-10	1.63023e-08
LEP	8.57548e-10	1.63023e-08
TLR9	9.54023e-10	1.79494e-08
FOXA1	9.73563e-10	1.81301e-08
HPGD	1.02935e-09	1.89755e-08
SKP1	1.07628e-09	1.9642e-08
STAT3	1.09994e-09	1.98752e-08
IFNA1	1.23921e-09	2.21721e-08
GAS1	1.28005e-09	2.26805e-08
HDAC1	1.31981e-09	2.31601e-08
APP	1.35744e-09	2.35936e-08
SH2B2	1.40732e-09	2.42297e-08
IFI6	1.4312e-09	2.42712e-08
ACSF3	1.44308e-09	2.42712e-08
HDC	1.44962e-09	2.42712e-08
MR1	1.52539e-09	2.53076e-08
PCNA	1.61109e-09	2.64886e-08
ANP32B	1.66815e-09	2.71819e-08
MPO	1.7051e-09	2.75159e-08
IFITM2	1.7188e-09	2.75159e-08
SLAMF7	1.76735e-09	2.78345e-08
IL16	1.76921e-09	2.78345e-08
ESR2	1.83443e-09	2.8614e-08
IL11RA	1.98645e-09	3.07226e-08
LAMA1	2.02647e-09	3.10783e-08
TPO	2.05214e-09	3.12096e-08
NLRP3	2.07024e-09	3.12247e-08
SMPD3	2.12943e-09	3.16652e-08
CCL1	2.13415e-09	3.16652e-08
CCND2	2.19032e-09	3.22366e-08
ROR2	2.24763e-09	3.28154e-08
NFATC4	2.38584e-09	3.43981e-08
FGFR1	2.39373e-09	3.43981e-08
EPOR	2.51628e-09	3.58766e-08
FOXJ1	2.64275e-09	3.73171e-08
CD160	2.6582e-09	3.73171e-08
NID2	2.74185e-09	3.81976e-08
FZD8	2.7767e-09	3.839e-08
TNFRSF12A	2.83864e-09	3.87592e-08
KLRG1	2.84588e-09	3.87592e-08
TP73	2.88747e-09	3.90343e-08
CD300A	3.00951e-09	4.03849e-08
LDHB	3.13519e-09	4.14816e-08
CD22	3.15124e-09	4.14816e-08
BTLA	3.15942e-09	4.14816e-08
IL24	3.30414e-09	4.30417e-08
IFNA17	3.32838e-09	4.30417e-08
TXK	3.349e-09	4.30417e-08
TNFRSF18	3.37892e-09	4.31226e-08
GHR	3.69746e-09	4.68602e-08
HK1	3.82544e-09	4.81477e-08
FGF23	4.0334e-09	5.04175e-08
WNT10B	4.09558e-09	5.05861e-08
HOXA10	4.12754e-09	5.05861e-08
LY6E	4.13004e-09	5.05861e-08
TIAM1	4.24346e-09	5.16287e-08
PAX8	4.27333e-09	5.16478e-08
HLA-G	4.43669e-09	5.32694e-08
FBXW7	4.63873e-09	5.53272e-08
COL6A6	4.6687e-09	5.53272e-08
SIRT4	4.70273e-09	5.53709e-08
TWIST1	4.85786e-09	5.65693e-08
FGFR4	4.86651e-09	5.65693e-08
PSMB7	4.97073e-09	5.74151e-08
POU5F1	5.07875e-09	5.82938e-08
AICDA	5.95889e-09	6.79685e-08
TMEM173	6.1659e-09	6.9562e-08
APOA2	6.19915e-09	6.9562e-08
BLNK	6.21294e-09	6.9562e-08
HES5	6.25843e-09	6.96441e-08
TPI1	6.42366e-09	7.10496e-08
LTA	6.61371e-09	7.25032e-08
CCL25	6.63454e-09	7.25032e-08
PLA2G2A	6.6887e-09	7.266e-08
ENG	6.91343e-09	7.46568e-08
NFATC1	7.20319e-09	7.6146e-08
PLA2G10	7.20615e-09	7.6146e-08
RPA3	7.22002e-09	7.6146e-08
NDUFA7	7.24885e-09	7.6146e-08
KBTBD8	7.25995e-09	7.6146e-08
ASPA	7.34194e-09	7.62383e-08
LY9	7.3523e-09	7.62383e-08
TNFSF4	7.48978e-09	7.72252e-08
ETS2	7.87067e-09	8.06965e-08
SIRPB2	8.11074e-09	8.26933e-08
APOA4	8.25461e-09	8.36817e-08
PNOC	8.29939e-09	8.36817e-08
TSLP	8.89885e-09	8.92329e-08
CCL28	8.95906e-09	8.93458e-08
KLRC2	9.04151e-09	8.9678e-08
TRDC	9.35073e-09	9.22436e-08
MASP1	9.57856e-09	9.39832e-08
GLI3	9.6383e-09	9.40637e-08
GATA2	9.8809e-09	9.55151e-08
FLNA	9.898e-09	9.55151e-08
FSTL3	9.94404e-09	9.55151e-08
KRT1	1.02307e-08	9.76015e-08
PTGER4	1.02682e-08	9.76015e-08
PBX3	1.05545e-08	9.98027e-08
SHC4	1.07163e-08	1.0081e-07
CREB3L3	1.09521e-08	1.02501e-07
PDK1	1.11132e-08	1.03478e-07
FGF1	1.15916e-08	1.07384e-07
CYP4A11	1.16677e-08	1.07469e-07
CLECL1	1.17186e-08	1.07469e-07
ICAM5	1.17817e-08	1.07508e-07
ARNT2	1.21675e-08	1.10005e-07
KIR2DS3	1.21759e-08	1.10005e-07
TREM2	1.22752e-08	1.10356e-07
CLEC6A	1.24701e-08	1.11558e-07
PFKM	1.30488e-08	1.1565e-07
PDGFC	1.30542e-08	1.1565e-07
CYP8B1	1.31226e-08	1.15695e-07
KRT6A/B/C	1.35554e-08	1.18936e-07
LRRN3	1.38675e-08	1.21092e-07
POU2F2	1.41808e-08	1.23238e-07
C1S	1.44021e-08	1.24568e-07
SPINK5	1.44774e-08	1.24628e-07
CD36	1.47798e-08	1.26634e-07
EIF5AL1	1.49505e-08	1.27284e-07
PLA2G3	1.49951e-08	1.27284e-07
ADH6	1.51755e-08	1.28219e-07
IGLL1	1.52508e-08	1.28262e-07
S100A7	1.54255e-08	1.29135e-07
DEFB134	1.55184e-08	1.2932e-07
ERCC6	1.57246e-08	1.30442e-07
IL1RAPL2	1.58153e-08	1.30601e-07
ATOX1	1.65031e-08	1.35667e-07
ITGA6	1.66689e-08	1.36416e-07
TTR	1.68241e-08	1.37071e-07
CAMK2B	1.70315e-08	1.38145e-07
FAM124B	1.72002e-08	1.38895e-07
SRD5A2	1.75541e-08	1.41129e-07
RASGRF1	1.7679e-08	1.4151e-07
DTX3L	1.79843e-08	1.428e-07
ACVR1C	1.79968e-08	1.428e-07
COL4A4	1.80858e-08	1.42886e-07
KIR2DS2	1.83435e-08	1.44297e-07
PSMD7	1.86122e-08	1.45782e-07
TRAF7	1.87689e-08	1.46357e-07
CFD	1.8846e-08	1.46357e-07
KIR2DL1	1.90277e-08	1.47142e-07
BCAT1	1.91901e-08	1.47772e-07
ACOT12	1.92814e-08	1.47851e-07
FGF6	1.99752e-08	1.5253e-07
PLA2G4A	2.01253e-08	1.53036e-07
ICAM4	2.03943e-08	1.54438e-07
RHOA	2.05456e-08	1.54672e-07
SOST	2.05947e-08	1.54672e-07
IRGM	2.06821e-08	1.54692e-07
BAX	2.17955e-08	1.61769e-07
CD99	2.18359e-08	1.61769e-07
FANCE	2.18942e-08	1.61769e-07
WNT6	2.24012e-08	1.64848e-07
TECR	2.25671e-08	1.65401e-07
RAB7A	2.31451e-08	1.6896e-07
PTCRA	2.37382e-08	1.72592e-07
FGF9	2.38319e-08	1.72592e-07
PPP2R2C	2.43346e-08	1.75281e-07
FCER2	2.43952e-08	1.75281e-07
C5	2.45038e-08	1.75371e-07
RPLP0	2.56249e-08	1.82153e-07
MUC1	2.56511e-08	1.82153e-07
POLD4	2.58265e-08	1.82688e-07
HLA-DPB1	2.59787e-08	1.82947e-07
SOD1	2.61118e-08	1.82947e-07
RELN	2.6164e-08	1.82947e-07
IRF4	2.66411e-08	1.85547e-07
VEGFD	2.6739e-08	1.85547e-07
AXL	2.68643e-08	1.85709e-07
IL1R2	2.70617e-08	1.86368e-07
ACVR2A	2.90025e-08	1.98248e-07
ASCL1	2.9004e-08	1.98248e-07
TNFRSF17	2.95279e-08	2.00621e-07
IL5	2.95709e-08	2.00621e-07
BTK	3.05724e-08	2.06647e-07
RPS6KA5	3.08433e-08	2.07708e-07
TFE3	3.17559e-08	2.13068e-07
SHC1	3.26426e-08	2.18215e-07
KRT17	3.30612e-08	2.20207e-07
TICAM1	3.32958e-08	2.20394e-07
MIA	3.33308e-08	2.20394e-07
TTC30A	3.38293e-08	2.22882e-07
ELANE	3.4832e-08	2.28663e-07
TNF	3.5377e-08	2.31409e-07
GRIN2B	3.58873e-08	2.33908e-07
GPX1	3.66199e-08	2.36288e-07
BRAF	3.66402e-08	2.36288e-07
CACNG6	3.66409e-08	2.36288e-07
FGF3	3.83668e-08	2.46547e-07
CD180	3.91772e-08	2.50872e-07
POLR2J	3.9316e-08	2.5088e-07
CTAGE1	4.00347e-08	2.54576e-07
CLCF1	4.05231e-08	2.56787e-07
COL2A1	4.16545e-08	2.6257e-07
NANOG	4.17235e-08	2.6257e-07
PLAU	4.24687e-08	2.66341e-07
MAP2K6	4.2771e-08	2.67118e-07
SRR	4.29712e-08	2.67118e-07
ROPN1	4.30316e-08	2.67118e-07
CEBPE	4.34187e-08	2.68607e-07
TNFSF13	4.36121e-08	2.68892e-07
NTRK1	4.38845e-08	2.68996e-07
TNFRSF11A	4.39928e-08	2.68996e-07
FGF14	4.40711e-08	2.68996e-07
NPM2	4.44287e-08	2.70275e-07
CIC	4.64252e-08	2.80621e-07
PAK5	4.6437e-08	2.80621e-07
IL12B	4.70487e-08	2.83379e-07
CEBPB	4.73992e-08	2.84551e-07
IRS1	4.83162e-08	2.89105e-07
KYAT1	4.88899e-08	2.90782e-07
PTTG2	4.89151e-08	2.90782e-07
FST	4.94401e-08	2.92949e-07
CCL13	4.98186e-08	2.94236e-07
ITGAM	5.36688e-08	3.15264e-07
RAC3	5.37368e-08	3.15264e-07
GRIN1	5.38972e-08	3.15264e-07
BLK	5.42245e-08	3.16165e-07
IGFBP3	5.46435e-08	3.17256e-07
LEFTY2	5.47592e-08	3.17256e-07
RORC	5.49928e-08	3.17601e-07
FCN1	5.60608e-08	3.22748e-07
GPI	6.03322e-08	3.46246e-07
TMEFF2	6.13372e-08	3.5091e-07
CD1D	6.18032e-08	3.52471e-07
RXRG	6.34987e-08	3.61013e-07
LOXL2	6.47173e-08	3.66477e-07
MAGEA4	6.48615e-08	3.66477e-07
WNT7A	6.5481e-08	3.68224e-07
ZBTB16	6.55989e-08	3.68224e-07
SEMG1	6.59112e-08	3.68224e-07
SREBF1	6.59776e-08	3.68224e-07
FGF10	6.80293e-08	3.78517e-07
COX6B1	7.16923e-08	3.96018e-07
MPL	7.17745e-08	3.96018e-07
RAD21	7.18257e-08	3.96018e-07
GLUL	7.23343e-08	3.96888e-07
GDF6	7.24184e-08	3.96888e-07
CALML6	7.48987e-08	4.09252e-07
BAIAP3	7.56172e-08	4.11944e-07
SIGLEC5	7.65476e-08	4.15772e-07
TIRAP	7.68434e-08	4.1614e-07
CACNG4	7.73017e-08	4.17383e-07
IL5RA	7.85977e-08	4.23129e-07
XCR1	7.91653e-08	4.24931e-07
LTBP1	8.02395e-08	4.29434e-07
FCGR2B	8.16357e-08	4.35629e-07
PSMB8	8.20128e-08	4.36365e-07
FCGR3B	8.25442e-08	4.374e-07
CD79A	8.26866e-08	4.374e-07
SH2D1B	8.41657e-08	4.41372e-07
IL1RL2	8.42538e-08	4.41372e-07
CD55	8.42677e-08	4.41372e-07
KLRF1	8.44048e-08	4.41372e-07
BCL2	8.47468e-08	4.41894e-07
EIF2AK2	8.57398e-08	4.45252e-07
PARP9	8.59191e-08	4.45252e-07
SERPINB2	8.61227e-08	4.45252e-07
CASP10	8.78874e-08	4.53092e-07
PRKCE	8.90363e-08	4.57722e-07
FGF22	8.93526e-08	4.58058e-07
FGF13	8.96304e-08	4.58195e-07
LDHA	9.01262e-08	4.59442e-07
CACNA2D1	9.27058e-08	4.71276e-07
IL6R	9.87525e-08	5.00621e-07
CCNA1	1.00598e-07	5.08563e-07
PPARGC1A	1.01105e-07	5.09713e-07
IL15	1.01593e-07	5.10761e-07
CT45A1	1.04041e-07	5.21636e-07
CR2	1.0452e-07	5.22599e-07
FGF21	1.05263e-07	5.24878e-07
SHC3	1.05855e-07	5.26391e-07
C8A	1.06796e-07	5.29627e-07
KLRK1	1.08527e-07	5.36752e-07
ARG1	1.09207e-07	5.38655e-07
SPIB	1.10923e-07	5.45646e-07
FZD7	1.11669e-07	5.47838e-07
H3C8	1.12462e-07	5.49327e-07
LAMA3	1.12574e-07	5.49327e-07
WNT16	1.13404e-07	5.51898e-07
FGF2	1.14739e-07	5.56911e-07
TREM1	1.15433e-07	5.58792e-07
CXCR6	1.17274e-07	5.66202e-07
POU2AF1	1.17927e-07	5.67465e-07
FGF12	1.18157e-07	5.67465e-07
IFIT1	1.19711e-07	5.73418e-07
NEFL	1.2593e-07	6.01627e-07
STAT2	1.27616e-07	6.08092e-07
PIK3CG	1.29704e-07	6.16433e-07
NDUFA12	1.31012e-07	6.21029e-07
FZD3	1.33915e-07	6.3315e-07
IFNA2	1.34753e-07	6.35463e-07
TAB1	1.35578e-07	6.37707e-07
MAPK8IP2	1.37825e-07	6.45412e-07
C8B	1.37991e-07	6.45412e-07
PRG2	1.38277e-07	6.45412e-07
PMEL	1.39163e-07	6.47888e-07
ISG20	1.45961e-07	6.77807e-07
CD70	1.46766e-07	6.79817e-07
PDCD1	1.47652e-07	6.82189e-07
MAGEA3	1.50214e-07	6.92273e-07
ASNS	1.52046e-07	6.97411e-07
NKX3-1	1.52093e-07	6.97411e-07
CYP19A1	1.54398e-07	7.06205e-07
IRF5	1.54798e-07	7.06266e-07
PLAUR	1.58168e-07	7.18628e-07
IFI27	1.58802e-07	7.18628e-07
APOM	1.59022e-07	7.18628e-07
TLR5	1.59083e-07	7.18628e-07
AIRE	1.61495e-07	7.27148e-07
APOC3	1.62015e-07	7.27148e-07
LTK	1.62164e-07	7.27148e-07
TNN	1.64824e-07	7.37264e-07
CACNA2D2	1.65844e-07	7.40012e-07
FGF4	1.66691e-07	7.41978e-07
MAGEC1	1.67977e-07	7.45883e-07
NAT8L	1.68855e-07	7.47962e-07
PRL	1.69737e-07	7.48676e-07
SMC1B	1.70213e-07	7.48676e-07
FN1	1.70247e-07	7.48676e-07
MASP2	1.71202e-07	7.49134e-07
RPS6	1.71301e-07	7.49134e-07
TNFSF9	1.71583e-07	7.49134e-07
PPARG	1.73331e-07	7.54961e-07
RNLS	1.75537e-07	7.62749e-07
CHEK2	1.76898e-07	7.66725e-07
MAP3K1	1.77292e-07	7.66725e-07
DSP	1.80413e-07	7.78379e-07
ADGRE1	1.841e-07	7.92412e-07
TNFRSF13C	1.84677e-07	7.93025e-07
GRIA3	1.89224e-07	8.09416e-07
TMPRSS2	1.89381e-07	8.09416e-07
NOD2	1.90556e-07	8.12533e-07
IL2	1.91968e-07	8.16647e-07
TAF3	1.92956e-07	8.18942e-07
IL1RL1	1.93745e-07	8.20384e-07
FOLH1	1.98486e-07	8.38511e-07
COL24A1	1.9896e-07	8.38575e-07
IL21	2.00134e-07	8.40233e-07
JAM3	2.00275e-07	8.40233e-07
IFNG	2.02796e-07	8.47573e-07
CTAG1B	2.02953e-07	8.47573e-07
EWSR1	2.03852e-07	8.4927e-07
CCR3	2.0429e-07	8.4927e-07
ZIC2	2.08898e-07	8.6645e-07
LILRA1	2.10516e-07	8.71184e-07
TARP	2.14772e-07	8.86786e-07
PPARGC1B	2.17706e-07	8.96872e-07
CMA1	2.30482e-07	9.47363e-07
CES3	2.31054e-07	9.47582e-07
ADH4	2.32517e-07	9.51442e-07
ACTA2	2.36834e-07	9.6662e-07
CALML3	2.37408e-07	9.6662e-07
CXCL14	2.37815e-07	9.6662e-07
PNMA1	2.40509e-07	9.75398e-07
PRKACG	2.41501e-07	9.7725e-07
PTPN5	2.45241e-07	9.90189e-07
KRT6B	2.459e-07	9.90656e-07
PC	2.51314e-07	1.01024e-06
LEPR	2.52017e-07	1.01084e-06
AFDN	2.53249e-07	1.01355e-06
ICAM3	2.58423e-07	1.032e-06
ETS1	2.62719e-07	1.04574e-06
CREB5	2.63011e-07	1.04574e-06
RASAL1	2.6666e-07	1.05795e-06
CD244	2.67469e-07	1.05885e-06
CASP12	2.69491e-07	1.06455e-06
CASP1	2.72421e-07	1.0738e-06
JADE1	2.78115e-07	1.09388e-06
TNFRSF1A	2.79264e-07	1.09604e-06
PLA2G1B	2.8098e-07	1.10003e-06
FZD1	2.81488e-07	1.10003e-06
MLANA	2.85169e-07	1.11204e-06
PLD1	2.89117e-07	1.12503e-06
NegProbe	2.97497e-07	1.15517e-06
EPO	2.99138e-07	1.15787e-06
SPACA3	2.99459e-07	1.15787e-06
FOXL2	3.03536e-07	1.17115e-06
IL10	3.06555e-07	1.17961e-06
TSHR	3.07023e-07	1.17961e-06
CDKN1C	3.16997e-07	1.21538e-06
TLR8	3.2358e-07	1.23638e-06
ITGA8	3.24311e-07	1.23638e-06
IL18RAP	3.24508e-07	1.23638e-06
FZD2	3.25888e-07	1.23905e-06
PYCR3	3.27827e-07	1.24384e-06
LAMB4	3.32351e-07	1.25838e-06
PLA2G4E	3.35968e-07	1.26944e-06
FASLG	3.39776e-07	1.28118e-06
MCAM	3.41996e-07	1.28689e-06
WNT3	3.49417e-07	1.31211e-06
TNFAIP6	3.54212e-07	1.32739e-06
PASD1	3.56939e-07	1.33487e-06
IGF1R	3.58795e-07	1.33791e-06
FGF20	3.59219e-07	1.33791e-06
MTF1	3.60394e-07	1.33955e-06
IDH2	3.62922e-07	1.34621e-06
SOD2	3.68055e-07	1.36248e-06
KLRD1	3.69152e-07	1.36377e-06
TYMP	3.75787e-07	1.38548e-06
ILF3	3.78238e-07	1.3917e-06
MBL2	3.84501e-07	1.4119e-06
PIK3CB	3.89019e-07	1.42562e-06
FANCC	3.92561e-07	1.43572e-06
DLL3	3.94159e-07	1.43868e-06
PTPRR	3.95943e-07	1.44231e-06
PRM1	3.98352e-07	1.44819e-06
CARD9	4.01803e-07	1.45783e-06
CR1	4.0399e-07	1.46152e-06
BCL2L1	4.04421e-07	1.46152e-06
AMBP	4.1477e-07	1.49596e-06
VTCN1	4.1589e-07	1.49704e-06
CCRL2	4.3515e-07	1.56329e-06
IFNL1	4.38373e-07	1.57177e-06
APH1B	4.40241e-07	1.57486e-06
CD46	4.40961e-07	1.57486e-06
CXXC4	4.4277e-07	1.57823e-06
TERT	4.44351e-07	1.58078e-06
FGF8	4.48787e-07	1.59346e-06
IL4	4.50585e-07	1.59673e-06
FGF16	4.51864e-07	1.59816e-06
FLG	4.61969e-07	1.63074e-06
PLCG2	4.72485e-07	1.66464e-06
CD8B	4.80386e-07	1.68922e-06
CCNB3	4.81981e-07	1.69157e-06
FGFR3	4.90667e-07	1.71875e-06
CD27	4.93911e-07	1.72419e-06
FEZ1	4.9411e-07	1.72419e-06
AMH	4.97364e-07	1.73223e-06
THEM4	5.01116e-07	1.74198e-06
WNT5B	5.02745e-07	1.7432e-06
CNTFR	5.03379e-07	1.7432e-06
PCK2	5.04783e-07	1.74475e-06
LAMP1	5.13375e-07	1.77109e-06
COL11A2	5.23558e-07	1.80282e-06
TCL1B	5.26485e-07	1.80948e-06
KRT7	5.31253e-07	1.82244e-06
WT1	5.37791e-07	1.83832e-06
ACTR3B	5.37897e-07	1.83832e-06
KRT18	5.40622e-07	1.84418e-06
MPPED1	5.4891e-07	1.86896e-06
ERCC2	5.50212e-07	1.8699e-06
IFNL2	5.52269e-07	1.8734e-06
CACNA1G	5.54081e-07	1.87532e-06
CASP7	5.54889e-07	1.87532e-06
SBNO2	5.57164e-07	1.87953e-06
CLEC4E	5.64736e-07	1.90156e-06
NRDE2	5.74221e-07	1.92993e-06
BRD4	5.75641e-07	1.93115e-06
DUSP8	5.87068e-07	1.96587e-06
JAK1	6.00329e-07	2.00659e-06
SLC11A1	6.08462e-07	2.02678e-06
NODAL	6.0859e-07	2.02678e-06
XCL2	6.16868e-07	2.05061e-06
WNT5A	6.27737e-07	2.08295e-06
TNFSF18	6.31983e-07	2.09323e-06
NTF3	6.44081e-07	2.12636e-06
CDKN2D	6.44317e-07	2.12636e-06
MAPK8IP1	6.54608e-07	2.15642e-06
DNMT1	6.60949e-07	2.17339e-06
PHGDH	6.64077e-07	2.17975e-06
PAX5	6.66105e-07	2.18248e-06
RPS6KB1	6.67899e-07	2.18343e-06
IL3	6.68787e-07	2.18343e-06
HSD11B1	6.72376e-07	2.19122e-06
IL27	6.83019e-07	2.22194e-06
IRAK2	6.88813e-07	2.23438e-06
EPM2AIP1	6.90694e-07	2.23438e-06
API5	6.91152e-07	2.23438e-06
CKLF	6.9174e-07	2.23438e-06
C9	7.0506e-07	2.27338e-06
BST1	7.14018e-07	2.29418e-06
H3C10	7.14025e-07	2.29418e-06
NCR1	7.19296e-07	2.30706e-06
GRIN2A	7.33489e-07	2.34845e-06
GADL1	7.45381e-07	2.38235e-06
GABPA	7.53695e-07	2.40471e-06
OASL	7.6401e-07	2.43337e-06
GZMM	7.69861e-07	2.44773e-06
PPP3R2	7.7251e-07	2.45188e-06
ENDOG	7.82505e-07	2.47929e-06
CACNG1	7.91248e-07	2.50265e-06
LCN2	7.92794e-07	2.5032e-06
MAP3K13	8.00459e-07	2.52304e-06
PPBP	8.14167e-07	2.56182e-06
LAT	8.17103e-07	2.56663e-06
EPCAM	8.24611e-07	2.58576e-06
FLT3	8.38821e-07	2.62581e-06
RIMKLA	8.54527e-07	2.6704e-06
IL11	8.65311e-07	2.69947e-06
CD24	8.67464e-07	2.70157e-06
HMGA2	8.72141e-07	2.71151e-06
ST6GAL1	8.77476e-07	2.72346e-06
CACNA2D3	9.14272e-07	2.83284e-06
TNFRSF14	9.19185e-07	2.84297e-06
LRP2	9.20655e-07	2.84297e-06
NKX2-1	9.29531e-07	2.86553e-06
SYCP1	9.50774e-07	2.92608e-06
CYP4A22	9.56602e-07	2.93906e-06
ATG10	9.71589e-07	2.97763e-06
SETBP1	9.7242e-07	2.97763e-06
PRMT8	9.76968e-07	2.98163e-06
KLRC1	9.76996e-07	2.98163e-06
TRAT1	9.93958e-07	3.02834e-06
FOXC1	9.99036e-07	3.03874e-06
ICAM2	1.00499e-06	3.05176e-06
IBSP	1.0078e-06	3.05522e-06
CD8A	1.01016e-06	3.05533e-06
FOSL1	1.01191e-06	3.05533e-06
MAP3K12	1.01286e-06	3.05533e-06
ITGA2B	1.03577e-06	3.11718e-06
PRKCB	1.03678e-06	3.11718e-06
HIF1A	1.05155e-06	3.15638e-06
BIRC7	1.05443e-06	3.15983e-06
LY86	1.05857e-06	3.16703e-06
CSF2RB	1.06403e-06	3.17817e-06
IFNB1	1.07257e-06	3.19842e-06
PIN1	1.08823e-06	3.23985e-06
PPP2R3A	1.09245e-06	3.2471e-06
CACNB4	1.10064e-06	3.26614e-06
IL17B	1.10733e-06	3.28063e-06
REN	1.12207e-06	3.31047e-06
CCL23	1.12404e-06	3.31047e-06
PLAT	1.1244e-06	3.31047e-06
CD38	1.12465e-06	3.31047e-06
BMPR1B	1.14744e-06	3.3721e-06
TNFSF12	1.15537e-06	3.38994e-06
REPS1	1.17194e-06	3.42818e-06
SYT17	1.17216e-06	3.42818e-06
CACNA2D4	1.17523e-06	3.43166e-06
EOMES	1.18791e-06	3.46315e-06
EFNA2	1.19136e-06	3.46767e-06
IL18R1	1.20259e-06	3.49477e-06
CCR9	1.20917e-06	3.50833e-06
FANCF	1.23691e-06	3.57954e-06
RBP4	1.23817e-06	3.57954e-06
HDAC11	1.24122e-06	3.57954e-06
EGF	1.24156e-06	3.57954e-06
NUMBL	1.25238e-06	3.60504e-06
NOG	1.25823e-06	3.61617e-06
CD81	1.26167e-06	3.62037e-06
PRKCG	1.29975e-06	3.72378e-06
SERINC3	1.30303e-06	3.72731e-06
C1QBP	1.30622e-06	3.7306e-06
FZD9	1.30957e-06	3.73431e-06
HHEX	1.31443e-06	3.74233e-06
IL25	1.34216e-06	3.81534e-06
ALDOC	1.34837e-06	3.82701e-06
SNCA	1.35252e-06	3.83283e-06
C4BPA	1.3568e-06	3.83794e-06
KLF4	1.35853e-06	3.83794e-06
TAPBPL	1.37029e-06	3.8652e-06
IFNA7	1.40139e-06	3.9468e-06
PF4	1.47357e-06	4.14157e-06
XCL1	1.47508e-06	4.14157e-06
AKT1	1.49869e-06	4.20139e-06
DUSP2	1.50579e-06	4.21482e-06
GNAS	1.50931e-06	4.21821e-06
PDGFRA	1.5134e-06	4.22317e-06
MAGEB2	1.52849e-06	4.25877e-06
CXCL1	1.54055e-06	4.28328e-06
PPP2CB	1.54198e-06	4.28328e-06
IL22RA2	1.54813e-06	4.29383e-06
CD1A	1.55908e-06	4.31763e-06
CCL14	1.59304e-06	4.40501e-06
MEN1	1.61627e-06	4.46247e-06
CBLC	1.62691e-06	4.48507e-06
RPTOR	1.63445e-06	4.49906e-06
FGF5	1.65267e-06	4.53344e-06
RPL23	1.65437e-06	4.53344e-06
PRUNE1	1.6544e-06	4.53344e-06
LIG4	1.67263e-06	4.57653e-06
IL9	1.68526e-06	4.59571e-06
GATA3	1.68713e-06	4.59571e-06
LAMC3	1.68719e-06	4.59571e-06
TLX1	1.6981e-06	4.61853e-06
AKAP1	1.70691e-06	4.63557e-06
LBP	1.71288e-06	4.64488e-06
WNT11	1.73044e-06	4.68553e-06
CTCFL	1.75734e-06	4.75134e-06
ITGAE	1.76738e-06	4.7714e-06
TMEM140	1.80917e-06	4.87593e-06
CCNO	1.81144e-06	4.87593e-06
NDUFA11	1.81431e-06	4.87645e-06
ITGB6	1.8254e-06	4.89905e-06
ELOB	1.84541e-06	4.94548e-06
IFNGR2	1.86889e-06	5.00107e-06
PTGDR2	1.8721e-06	5.00232e-06
NFAM1	1.87565e-06	5.00446e-06
CFP	1.8877e-06	5.02927e-06
APOB	1.91489e-06	5.09428e-06
CXCR5	1.9655e-06	5.2213e-06
TNFRSF8	1.9724e-06	5.23203e-06
PVRIG	1.97739e-06	5.23764e-06
EGR2	1.9821e-06	5.24251e-06
ALK	1.99014e-06	5.25617e-06
PLA2G4F	2.01218e-06	5.30668e-06
SLAMF6	2.02113e-06	5.32259e-06
RPL7A	2.0315e-06	5.34221e-06
TNC	2.06379e-06	5.4193e-06
MNX1	2.07902e-06	5.45145e-06
ATP2A2	2.08482e-06	5.45881e-06
MBNL3	2.09366e-06	5.47411e-06
CD19	2.10744e-06	5.49115e-06
IRAK3	2.10807e-06	5.49115e-06
IL13	2.1092e-06	5.49115e-06
FANCG	2.11519e-06	5.49888e-06
KRT14	2.13268e-06	5.53648e-06
DUOX1	2.14902e-06	5.57098e-06
FUT7	2.15539e-06	5.57956e-06
FCAR	2.18449e-06	5.64689e-06
BAG1	2.22202e-06	5.73576e-06
MAPT	2.24296e-06	5.78164e-06
ICOSLG	2.24885e-06	5.78864e-06
ALDOA	2.26728e-06	5.82787e-06
CD59	2.29211e-06	5.8834e-06
IL13RA2	2.30924e-06	5.91443e-06
WRN	2.31068e-06	5.91443e-06
CDK4	2.37261e-06	6.06445e-06
TLR6	2.38602e-06	6.09018e-06
TLR7	2.39434e-06	6.10288e-06
NOTCH2	2.46676e-06	6.27872e-06
IL19	2.50561e-06	6.36873e-06
DKK1	2.55595e-06	6.47772e-06
NOS1	2.55647e-06	6.47772e-06
CRABP2	2.55914e-06	6.47772e-06
PRAME	2.56648e-06	6.48728e-06
PAK3	2.57345e-06	6.49584e-06
TLR3	2.57698e-06	6.49584e-06
POLD1	2.62726e-06	6.61346e-06
RIN1	2.63508e-06	6.62398e-06
ITK	2.75339e-06	6.91189e-06
GNG12	2.79279e-06	7.00117e-06
CAMP	2.81219e-06	7.04012e-06
MST1R	2.92232e-06	7.30581e-06
ASPG	2.93501e-06	7.32748e-06
MICA	2.94746e-06	7.34851e-06
STAT1	2.9822e-06	7.42498e-06
IL17F	2.98746e-06	7.42796e-06
TNFSF8	2.99587e-06	7.43873e-06
CTSL	3.00479e-06	7.45074e-06
SPO11	3.02101e-06	7.48079e-06
WNT3A	3.05533e-06	7.55324e-06
TBX21	3.05855e-06	7.55324e-06
SIX1	3.06805e-06	7.56647e-06
FGF19	3.08167e-06	7.5898e-06
PTCD2	3.13163e-06	7.69923e-06
SMARCA4	3.13454e-06	7.69923e-06
NGF	3.18123e-06	7.80342e-06
SMO	3.26415e-06	7.99608e-06
HDAC2	3.27049e-06	8.00085e-06
PLCE1	3.28214e-06	8.01841e-06
HMGN5	3.289e-06	8.01841e-06
C6	3.29084e-06	8.01841e-06
FGF7	3.35937e-06	8.17446e-06
CEACAM8	3.36849e-06	8.18575e-06
DDIT3	3.40801e-06	8.27077e-06
CHAD	3.42094e-06	8.29113e-06
NR4A3	3.49466e-06	8.45855e-06
CFB	3.50322e-06	8.46805e-06
IL7	3.5247e-06	8.5087e-06
NASP	3.53557e-06	8.51869e-06
PAX3	3.53817e-06	8.51869e-06
CCL26	3.55389e-06	8.54526e-06
MCM7	3.65464e-06	8.77595e-06
MYCN	3.72139e-06	8.92449e-06
PMS2	3.7794e-06	9.05171e-06
PGPEP1	3.80687e-06	9.10557e-06
ATP11C	3.82453e-06	9.13581e-06
OTOA	3.84929e-06	9.18294e-06
PPP2R2B	3.85817e-06	9.19212e-06
NAT1	3.88093e-06	9.22496e-06
COX5B	3.88206e-06	9.22496e-06
IL20RA	4.05274e-06	9.61801e-06
E2F5	4.08915e-06	9.69182e-06
TSPAN7	4.10248e-06	9.71079e-06
CDC14A	4.18873e-06	9.90211e-06
UBC	4.27054e-06	1.00825e-05
HAMP	4.33127e-06	1.02126e-05
STAT4	4.39246e-06	1.03435e-05
CDH2	4.45963e-06	1.04882e-05
SOCS2	4.52233e-06	1.0622e-05
STAG2	4.55827e-06	1.06926e-05
CMTM6	4.56668e-06	1.06986e-05
DTX1	4.62315e-06	1.0817e-05
TFEB	4.63991e-06	1.08413e-05
AQP9	4.64544e-06	1.08413e-05
PDCD1LG2	4.80589e-06	1.12015e-05
RAG1	4.86327e-06	1.13207e-05
TCF7L1	4.90388e-06	1.14007e-05
CD1E	4.91245e-06	1.14061e-05
MS4A2	4.97417e-06	1.15348e-05
ARG2	5.00382e-06	1.15888e-05
OTC	5.07835e-06	1.17465e-05
GAGE1	5.17905e-06	1.19643e-05
RIMKLB	5.32735e-06	1.22805e-05
SOX17	5.32938e-06	1.22805e-05
LCOR	5.52e-06	1.27037e-05
RET	5.5444e-06	1.27438e-05
BDNF	5.55989e-06	1.27633e-05
ANXA1	5.58867e-06	1.28132e-05
MDC1	5.62174e-06	1.28729e-05
IGF1	5.71098e-06	1.30608e-05
C2	5.71822e-06	1.3061e-05
MUTYH	5.7467e-06	1.31097e-05
CRP	5.76238e-06	1.3129e-05
IRAK4	5.83098e-06	1.32688e-05
PPP3CC	6.0105e-06	1.36602e-05
CCL27	6.0474e-06	1.3727e-05
TAL1	6.06592e-06	1.37519e-05
PSPH	6.11974e-06	1.38567e-05
XPA	6.17537e-06	1.39654e-05
MAGEC2	6.22788e-06	1.40667e-05
FPR2	6.25903e-06	1.41112e-05
FZD4	6.26305e-06	1.41112e-05
TCL1A	6.30729e-06	1.41933e-05
NECTIN2	6.31829e-06	1.42006e-05
NOD1	6.33823e-06	1.42279e-05
RPS27A	6.45786e-06	1.44786e-05
CSF3	6.67816e-06	1.49542e-05
SPINK1	6.73882e-06	1.50715e-05
KRT5	6.74739e-06	1.50722e-05
TACSTD2	6.77214e-06	1.5109e-05
APOA1	6.8548e-06	1.52747e-05
PIK3R5	6.96488e-06	1.54856e-05
IL1A	6.96638e-06	1.54856e-05
CCL18	7.00791e-06	1.55589e-05
ZBTB32	7.01665e-06	1.55594e-05
DUSP10	7.02814e-06	1.5566e-05
BAGE	7.05572e-06	1.56081e-05
ADORA2A	7.06743e-06	1.56151e-05
LILRA5	7.14819e-06	1.57744e-05
DUSP6	7.21641e-06	1.58994e-05
RICTOR	7.22225e-06	1.58994e-05
DDB2	7.50522e-06	1.65024e-05
PGR	7.53379e-06	1.65453e-05
IL12RB2	7.56809e-06	1.66007e-05
CASP9	7.61905e-06	1.66924e-05
MAP2K4	7.63519e-06	1.67077e-05
CXCR3	7.73125e-06	1.68977e-05
FOXA2	7.76124e-06	1.69429e-05
MMP7	7.81214e-06	1.70336e-05
MAP3K14	7.89055e-06	1.71841e-05
SIGLEC1	8.00335e-06	1.74089e-05
CRLF2	8.04374e-06	1.7476e-05
SMC1A	8.08753e-06	1.75502e-05
MAGEA1	8.16994e-06	1.7708e-05
DKK4	8.26989e-06	1.78994e-05
TNKS	8.27788e-06	1.78994e-05
GZMK	8.32205e-06	1.79736e-05
CCL15	8.52717e-06	1.8375e-05
JUNB	8.528e-06	1.8375e-05
SPRY4	8.58155e-06	1.84686e-05
TICAM2	8.59569e-06	1.84772e-05
TNFRSF10A	8.64805e-06	1.85679e-05
CACNA1E	8.73347e-06	1.87292e-05
THBS4	8.87719e-06	1.90151e-05
MARCO	9.00101e-06	1.92577e-05
STK11IP	9.0251e-06	1.92867e-05
RHOB	9.14536e-06	1.95208e-05
FLNC	9.17783e-06	1.95672e-05
LAIR2	9.28185e-06	1.97659e-05
WNT2	9.34502e-06	1.98772e-05
ULBP2	9.35866e-06	1.98831e-05
SMAD3	9.38728e-06	1.99207e-05
IL32	9.44223e-06	2.00028e-05
DSC3	9.4479e-06	2.00028e-05
CLEC4C	9.53614e-06	2.01662e-05
CDC25C	9.69529e-06	2.04791e-05
CD28	9.73093e-06	2.05306e-05
PBK	9.76885e-06	2.05725e-05
DDX43	9.77333e-06	2.05725e-05
GADD45G	9.85354e-06	2.07174e-05
CHIT1	9.87381e-06	2.07361e-05
FZD10	9.88737e-06	2.07408e-05
CD3EAP	9.90376e-06	2.07513e-05
PLA2G5	1.0118e-05	2.11759e-05
CREB3L1	1.02492e-05	2.14258e-05
NDUFB4	1.03218e-05	2.15529e-05
PDZK1IP1	1.05102e-05	2.19213e-05
HLA-DOB	1.08209e-05	2.25436e-05
XRCC4	1.09567e-05	2.28004e-05
IL13RA1	1.11163e-05	2.31062e-05
CD48	1.11824e-05	2.32172e-05
DEFB1	1.14386e-05	2.37222e-05
MAPK11	1.1504e-05	2.38306e-05
KAT2B	1.16214e-05	2.40464e-05
MEF2C	1.16916e-05	2.41645e-05
TIGIT	1.17526e-05	2.42631e-05
MEFV	1.19165e-05	2.45736e-05
IL23A	1.23686e-05	2.54771e-05
TLR2	1.26821e-05	2.60933e-05
CX3CL1	1.28459e-05	2.64007e-05
APOE	1.30103e-05	2.66993e-05
CLU	1.30205e-05	2.66993e-05
ID4	1.32767e-05	2.7194e-05
GPR160	1.34587e-05	2.7536e-05
MX1	1.38878e-05	2.83821e-05
U2AF1	1.42117e-05	2.90115e-05
LTF	1.42462e-05	2.90494e-05
CD209	1.45548e-05	2.96458e-05
CXCR1	1.46913e-05	2.98904e-05
CDC25B	1.48738e-05	3.0228e-05
VEGFB	1.49343e-05	3.03172e-05
SGK2	1.49861e-05	3.03886e-05
CARD11	1.5244e-05	3.08771e-05
C3	1.52912e-05	3.09383e-05
STMN1	1.55371e-05	3.14012e-05
NTRK2	1.61261e-05	3.25555e-05
F13A1	1.61667e-05	3.25817e-05
NOS2	1.61748e-05	3.25817e-05
ALKBH2	1.62307e-05	3.26582e-05
EFNA5	1.67175e-05	3.36007e-05
NCAM1	1.70475e-05	3.42262e-05
NEIL1	1.71779e-05	3.44503e-05
RSAD2	1.74993e-05	3.50561e-05
DACH2	1.78199e-05	3.56594e-05
BRCA2	1.80613e-05	3.61028e-05
JAG1	1.80973e-05	3.61351e-05
TPTE	1.81525e-05	3.62057e-05
NCF4	1.85732e-05	3.70044e-05
S100A12	1.8675e-05	3.71666e-05
MAP3K8	1.88316e-05	3.74375e-05
IKBKG	1.90037e-05	3.77386e-05
C5AR1	1.93339e-05	3.83525e-05
CEACAM3	1.95092e-05	3.86583e-05
BMP5	1.97314e-05	3.90561e-05
GLUD1	1.9997e-05	3.95391e-05
PPL	2.01729e-05	3.98437e-05
GRB7	2.02484e-05	3.99496e-05
COLEC12	2.03167e-05	4.00409e-05
CCL16	2.03933e-05	4.01486e-05
FGF17	2.04831e-05	4.02819e-05
AKT3	2.05051e-05	4.02819e-05
SIGIRR	2.17296e-05	4.26415e-05
DTX3	2.18964e-05	4.29226e-05
C8G	2.19366e-05	4.29553e-05
CSF2	2.19973e-05	4.3028e-05
BMP8A	2.20872e-05	4.31575e-05
COL4A6	2.2217e-05	4.33647e-05
OPN3	2.22466e-05	4.33761e-05
E2F4	2.24071e-05	4.36424e-05
TRAF6	2.24336e-05	4.36475e-05
CD1B	2.26178e-05	4.39589e-05
PIAS4	2.31738e-05	4.49917e-05
PRKACB	2.32807e-05	4.51512e-05
IL26	2.43488e-05	4.71371e-05
FPR1	2.43563e-05	4.71371e-05
CCL7	2.44982e-05	4.73614e-05
INHBB	2.45272e-05	4.73673e-05
MYC	2.53837e-05	4.89696e-05
RNF43	2.63311e-05	5.07437e-05
TBP	2.65323e-05	5.10774e-05
ATP5ME	2.68793e-05	5.1691e-05
WNT7B	2.70867e-05	5.2035e-05
NF2	2.7448e-05	5.26468e-05
CLEC5A	2.74629e-05	5.26468e-05
BBS1	2.82716e-05	5.41403e-05
TMEM163	2.83145e-05	5.41656e-05
CCL8	2.84892e-05	5.44427e-05
SELP	2.90509e-05	5.54581e-05
FCER1A	2.92691e-05	5.58162e-05
MSR1	2.93131e-05	5.58418e-05
BAD	2.95373e-05	5.62103e-05
KIR3DL2	2.96707e-05	5.64052e-05
MIF	3.05061e-05	5.7933e-05
GOT1	3.09553e-05	5.8725e-05
LY96	3.30388e-05	6.26125e-05
IL18	3.33537e-05	6.31437e-05
PRKDC	3.43317e-05	6.49277e-05
SLC16A2	3.49462e-05	6.60216e-05
RIPK3	3.57573e-05	6.7484e-05
TTPA	3.63838e-05	6.85955e-05
NFATC2	3.65084e-05	6.87593e-05
TAP1	3.66537e-05	6.89618e-05
DGLUCY	3.68573e-05	6.92736e-05
PPP2R1A	3.70356e-05	6.94737e-05
PRLR	3.704e-05	6.94737e-05
PALMD	3.7152e-05	6.96123e-05
MS4A4A	3.73151e-05	6.98461e-05
SNAI2	3.78384e-05	7.07532e-05
FADD	3.80852e-05	7.11417e-05
IL20RB	3.83781e-05	7.15705e-05
SDHA	3.83932e-05	7.15705e-05
TNFRSF11B	3.8862e-05	7.23705e-05
PSMB5	3.89174e-05	7.23998e-05
SIRPA	3.90352e-05	7.25451e-05
IL23R	3.94071e-05	7.31617e-05
IL1R1	3.95307e-05	7.33166e-05
RRAD	3.9833e-05	7.3763e-05
CD33	3.98522e-05	7.3763e-05
JUP	4.01228e-05	7.41886e-05
OLR1	4.04317e-05	7.46841e-05
MAGEA12	4.17157e-05	7.69779e-05
NDUFA1	4.19574e-05	7.73457e-05
PARP4	4.28199e-05	7.8856e-05
P2RY13	4.34898e-05	8.0009e-05
EYA1	4.42981e-05	8.14139e-05
PRDX5	4.45421e-05	8.17799e-05
IL1RAP	4.47429e-05	8.20661e-05
F12	4.61166e-05	8.45009e-05
TMUB2	4.66397e-05	8.53736e-05
FOXO4	4.76208e-05	8.70821e-05
MFNG	4.78471e-05	8.74084e-05
HK2	4.79939e-05	8.75889e-05
ABL1	4.84063e-05	8.82533e-05
SSX4	4.85779e-05	8.84778e-05
ANGPTL4	4.87806e-05	8.87583e-05
BMI1	4.90954e-05	8.92421e-05
EDN1	4.98666e-05	9.05538e-05
ITGB4	5.10927e-05	9.2688e-05
LCP1	5.17461e-05	9.37801e-05
WIF1	5.23685e-05	9.4814e-05
NDC1	5.37761e-05	9.7266e-05
HDAC4	5.44274e-05	9.83466e-05
ELK1	5.55155e-05	0.000100213
RUNX1T1	5.62326e-05	0.000101331
UBE2C	5.62454e-05	0.000101331
ITGB8	5.67494e-05	0.000102138
CASP8	5.74478e-05	0.000103293
ISG15	5.75561e-05	0.000103386
GZMH	5.76996e-05	0.000103542
SPA17	6.00283e-05	0.000107615
CDKN2B	6.08993e-05	0.000109069
EFNA3	6.11177e-05	0.000109353
GNGT1	6.13414e-05	0.000109608
FAAP24	6.14389e-05	0.000109608
RAD52	6.14408e-05	0.000109608
MCAT	6.24338e-05	0.000111271
CGAS	6.30756e-05	0.000112305
LILRB1	6.39638e-05	0.000113776
TFDP1	6.41713e-05	0.000114024
NFKBIE	6.42285e-05	0.000114024
EHHADH	6.51481e-05	0.000115545
CCNE1	6.70767e-05	0.000118849
PYCR1	6.84702e-05	0.000121201
AKR1C4	6.92746e-05	0.000122506
ADA	7.11756e-05	0.000125746
ETV1	7.34801e-05	0.000129692
FH	7.3593e-05	0.000129765
CACNA1C	7.41399e-05	0.000130604
CD47	7.68598e-05	0.000135264
CREB3L4	7.72286e-05	0.000135783
CAPN2	7.85122e-05	0.000137906
LAMC2	7.86543e-05	0.000138023
CD7	7.92923e-05	0.000139009
TCF7	7.97184e-05	0.000139622
NSD1	8.1457e-05	0.00014253
AREG	8.18079e-05	0.000143007
MXI1	8.36058e-05	0.00014601
CACNA1D	8.38203e-05	0.000146245
MYB	8.41068e-05	0.000146605
IFIT3	8.55359e-05	0.000148953
CLEC4A	8.65741e-05	0.000150617
FLNB	8.85218e-05	0.000153859
CACNB2	8.9463e-05	0.000155347
PLA2G6	9.04402e-05	0.000156895
OAZ1	9.14256e-05	0.000158454
RIPK1	9.17323e-05	0.000158834
CCL20	9.38225e-05	0.0001623
RB1	9.87016e-05	0.000170578
ACY1	9.88304e-05	0.000170639
FUT5	0.000101122	0.000174431
CD63	0.000104488	0.000180067
DPP4	0.000110228	0.000189779
ITGA3	0.000112433	0.000193393
KLRB1	0.000113628	0.000195264
HDAC10	0.000117697	0.000202067
ITGB3	0.000117988	0.000202376
POLE2	0.000120037	0.000205697
IER3	0.000123827	0.000211992
RAD51C	0.000124509	0.000212829
NRP1	0.000124548	0.000212829
EXO1	0.000127797	0.000218176
MS4A1	0.00013499	0.00023024
GPX4	0.000135913	0.000231597
AMER1	0.000136632	0.000232606
TXN2	0.000137497	0.00023386
RRAS2	0.000137997	0.000234492
MAPK10	0.000138546	0.000235057
RASGRP1	0.000138587	0.000235057
PRF1	0.000138868	0.000235314
EGR1	0.000139906	0.000236855
CD40LG	0.000140147	0.000237042
RASGRF2	0.000141448	0.000239021
LEFTY1	0.000147154	0.000248433
COX6A1	0.000148882	0.000250966
SELPLG	0.00014893	0.000250966
TWF1	0.000149156	0.000251117
IHH	0.000152974	0.000257149
SOCS3	0.000153021	0.000257149
IL33	0.000153583	0.000257855
NAALAD2	0.000159809	0.000268063
CD1C	0.000160695	0.000269301
FCGR1A	0.000162145	0.000271482
PTEN	0.000166613	0.000278707
EGFR	0.000169888	0.000283924
GBP1	0.000176099	0.000294036
CDC7	0.000179476	0.000299347
PMCH	0.000179608	0.000299347
OAS3	0.000180405	0.0003004
TRIM21	0.00018108	0.000301249
CDKN2A	0.000183646	0.00030524
CX3CR1	0.000184191	0.000305684
IL7R	0.000184248	0.000305684
DAB2	0.000184637	0.000306051
LIFR	0.000185835	0.000307757
NFIL3	0.000192204	0.000318017
RAD51	0.000198429	0.000327752
WNT4	0.000198447	0.000327752
MAP4K2	0.00019925	0.000328781
BCOR	0.000202756	0.000334264
FGF18	0.000205384	0.000338291
TLR10	0.000207058	0.000340695
NDUFA13	0.000207217	0.000340695
USP9Y	0.000209531	0.00034419
TCF3	0.000209761	0.000344256
E2F3	0.000210912	0.000345835
MAP3K7	0.000211894	0.000347134
CD5	0.000214207	0.000350608
NDUFB10	0.000215137	0.000351815
H3C2	0.000216059	0.000353006
GDF15	0.000217746	0.000355444
NFE2L2	0.000219573	0.000358106
SH2D1A	0.000220266	0.000358915
NUPR1	0.000220963	0.000359731
CDKN2C	0.000222776	0.000362358
PRKAR2B	0.000224204	0.000364356
MNAT1	0.000228226	0.000370563
SHC2	0.000241398	0.000391602
PLA2G4C	0.000250634	0.000406222
TNFRSF4	0.000252767	0.000409317
FUBP1	0.000256462	0.000414931
ECSIT	0.000261514	0.00042273
SUV39H2	0.000266941	0.000431122
MYCT1	0.000269891	0.000435501
TNFRSF9	0.000270455	0.000436024
PBX1	0.000272963	0.00043968
FZD6	0.000274483	0.000441738
CHUK	0.000275862	0.000443567
PITX2	0.000279264	0.000448641
PIK3R2	0.000281624	0.000452034
UQCR10	0.00028403	0.000455496
IL21R	0.000290902	0.000466107
CST2	0.000294474	0.000471416
APC	0.000302727	0.000484204
IFNA8	0.0003119	0.000498439
CYFIP2	0.000312628	0.000499166
EBI3	0.000317324	0.000506221
PTTG1	0.000318891	0.000508277
SAMD9	0.000323636	0.000515389
SOX11	0.000329585	0.000524404
IGF2R	0.000330804	0.000525885
CDKN1B	0.000331685	0.000526828
ROCK1	0.000332958	0.000528389
TLR1	0.000339325	0.000538026
POLR2A	0.000341131	0.00054042
FUT4	0.000349471	0.000553152
TGFB2	0.000350558	0.000554392
GLI1	0.000363428	0.000574248
ATG12	0.000368625	0.000581956
LILRA4	0.000372623	0.000587758
GADD45B	0.000374687	0.000590504
PSMB2	0.00037601	0.000592078
CD207	0.000385038	0.000605771
NDUFA3	0.000386321	0.000607266
IL34	0.000396798	0.000623199
ERO1A	0.000398795	0.000625796
TNFSF14	0.000413117	0.000647713
NUF2	0.000414877	0.000649914
CDC25A	0.000421987	0.000659922
COL27A1	0.000421989	0.000659922
CTSH	0.000423418	0.00066159
OAT	0.000428558	0.000669049
BMP2	0.000447451	0.000697948
ORC6	0.00046941	0.000731574
MLF1	0.000476506	0.000741999
TSC1	0.000486021	0.000756171
P4HA1	0.000488162	0.000758855
CXCR2	0.000505028	0.000784404
ARID2	0.000507095	0.000786946
CDKN1A	0.000513715	0.000796541
GOT2	0.000531789	0.000823866
PLA1A	0.000536032	0.000829736
MRE11	0.000540509	0.000835957
PRKACA	0.000551059	0.000850896
STAT6	0.000551101	0.000850896
POLR1B	0.000554291	0.000855098
TOX	0.000557279	0.000858981
CD274	0.000567287	0.00087367
PEBP1	0.00056966	0.000876584
CALML5	0.00057701	0.000887146
BAP1	0.000580066	0.000891095
HLA-B	0.000583471	0.000895571
MAF	0.00058566	0.000898175
F2RL1	0.000586154	0.000898179
CCR6	0.000611877	0.000936809
PSMB9	0.000615144	0.00094102
HSPB1	0.000616174	0.000941807
HOXA11	0.000617471	0.000942999
IL1RN	0.000630301	0.000961789
AXIN2	0.000636536	0.000970491
NDUFA2	0.000641693	0.000977538
IL10RA	0.000647102	0.000984955
BID	0.000654745	0.000995758
LYZ	0.00065704	0.000998416
NSD2	0.000666938	0.00101233
AKT2	0.000667309	0.00101233
TNFSF13B	0.000668953	0.00101399
CDH1	0.000675017	0.00102233
ITGA5	0.000677006	0.00102449
TNFRSF10C	0.000685291	0.00103617
TET2	0.000698671	0.00105553
CDC14B	0.000705392	0.0010648
CYBB	0.000709902	0.00107072
CCL17	0.000711584	0.00107237
SOX9	0.000717362	0.00108019
SIN3A	0.000730343	0.00109883
CD96	0.000733332	0.00110241
FANCB	0.000755885	0.00113538
LILRA3	0.000786435	0.0011803
ATP5F1D	0.000792546	0.00118849
CEACAM6	0.000797723	0.00119527
KDM6A	0.000809859	0.00121246
ICAM1	0.000813845	0.00121743
LAG3	0.000818884	0.00122397
SPP1	0.000826241	0.00123395
BCL10	0.000831245	0.00124041
FOLH1B	0.000831976	0.00124049
PRKCA	0.000836507	0.00124623
LAMP2	0.000840151	0.00125063
ANGPT1	0.000875397	0.00130204
ZC3H12A	0.000876197	0.00130217
ITGA9	0.000877617	0.00130321
MKI67	0.000880872	0.00130699
IFNAR1	0.00090039	0.00133486
IL22	0.000905381	0.00134117
MAPK12	0.000908472	0.00134466
WNT2B	0.000919855	0.0013604
AR	0.000944712	0.00139603
ZAP70	0.000946087	0.00139693
SLC39A6	0.000954623	0.00140735
CD84	0.000954685	0.00140735
LGALS3	0.000959251	0.00141294
GIMAP6	0.000972141	0.00143077
PRR5	0.000994342	0.00146227
ENTPD1	0.00103903	0.00152675
COX4I1	0.00104731	0.00153768
ATM	0.00108661	0.00159411
FEN1	0.00109914	0.00161119
FCGR3A	0.00110545	0.00161745
DTX4	0.00110587	0.00161745
PTPN11	0.00110607	0.00161745
RRM2	0.00114358	0.00167096
IRF1	0.00116474	0.00169808
ME2	0.00116476	0.00169808
MAML2	0.00116493	0.00169808
INPP5D	0.00117314	0.00170868
LIF	0.00118589	0.00172588
HSPA6	0.00122429	0.00178034
VSIR	0.00123346	0.00179225
TOP2A	0.00123479	0.00179275
SKP2	0.00126162	0.00183025
BRIP1	0.00130987	0.00189873
MRM2	0.00132993	0.00192628
SYK	0.00133529	0.00193252
LILRB3	0.00134972	0.00195186
DUSP4	0.0013615	0.00196733
BIRC3	0.00138813	0.00200422
MAD2L2	0.00140038	0.00202031
SLC1A5	0.00140614	0.00202702
CASP3	0.00142459	0.002052
OSM	0.00143143	0.00206022
SRSF2	0.0014446	0.00207657
CFI	0.00144507	0.00207657
SF3B1	0.00144885	0.00208037
PFKFB3	0.00146484	0.00210168
PIK3CA	0.00146898	0.00210596
RAC2	0.00150373	0.00215408
DMBT1	0.00161618	0.00231336
DKK2	0.00163941	0.00234477
MCM5	0.00164527	0.00235131
CD164	0.0016524	0.00235964
PRKCD	0.0016836	0.00240232
COL17A1	0.00170361	0.00242897
CPSF7	0.0017188	0.00244872
HLA-A	0.00177693	0.00252956
ASL	0.00181369	0.00257987
DUSP5	0.00182626	0.00259573
HHIP	0.00184889	0.00262586
B2M	0.00185166	0.00262775
ICOS	0.00186857	0.00264968
HMGA1	0.00188863	0.00267605
CPA3	0.00197435	0.00279533
NTHL1	0.00201615	0.00285231
CCNE2	0.00203323	0.00287424
APOL6	0.00211437	0.00298662
ITGAL	0.00217354	0.00306715
LTBR	0.00217474	0.00306715
THBD	0.00223147	0.00314474
GBP2	0.00224337	0.00315906
DNAJC14	0.00225897	0.00317859
HAVCR2	0.00227212	0.00319463
NRAS	0.00229788	0.00322835
HMGB1	0.00233238	0.0032743
TMEM45B	0.00234459	0.00328892
IL2RG	0.00237298	0.00332618
REL	0.00237938	0.0033326
MMP1	0.00238861	0.00334295
IFIT2	0.00243349	0.00340316
IRF9	0.0024778	0.00346247
IRF8	0.00251693	0.00351446
NDC80	0.00253225	0.00353314
S100A8	0.00257667	0.00359237
MMP3	0.00259801	0.00361936
PKP3	0.00261692	0.00364293
CD247	0.00268743	0.00373822
CD44	0.00269441	0.00374508
SF3A1	0.00273094	0.00379297
TLK2	0.00276353	0.00383531
NR3C1	0.00299098	0.00414782
CXCL10	0.00301521	0.00417825
FCER1G	0.0030291	0.00419289
SGK1	0.00303036	0.00419289
IDH1	0.00307937	0.00425747
DAXX	0.0031319	0.00432682
SMC3	0.00313473	0.00432744
CXCL11	0.0031489	0.00434373
MCL1	0.00317785	0.00438034
BCL6	0.0031821	0.00438289
NDUFS8	0.00320873	0.00441624
CCL3L1	0.00321958	0.00442784
TAPBP	0.00324648	0.00446076
IRAK1	0.00324841	0.00446076
NOTCH1	0.00332956	0.00456876
RIPK2	0.00344362	0.00472172
ALKBH3	0.00346691	0.00475008
SERPINB5	0.00347059	0.00475156
ATF1	0.00353176	0.00483168
SMARCB1	0.00358961	0.00490714
GRB2	0.00364851	0.00498393
MTOR	0.003661	0.00499725
HLA-DRA	0.00373158	0.00508978
SELL	0.00374362	0.0051024
HEY1	0.00381126	0.00519071
TRAF3	0.00386455	0.00525657
PYCR2	0.00386538	0.00525657
DDX58	0.00388204	0.00527297
ANKRD28	0.00388322	0.00527297
ZEB2	0.00397203	0.00538956
ELMO1	0.00403849	0.00547566
CCL5	0.00406174	0.0055031
RASGRP2	0.00418194	0.00566175
PSEN1	0.00419671	0.00567754
SNAI1	0.00421129	0.00569304
EIF2B4	0.00424078	0.00572867
TBL1XR1	0.00427802	0.00577469
CCL19	0.00448625	0.00605129
HSPA2	0.0047212	0.00636351
PDGFD	0.00473372	0.00637568
RPS6KA6	0.00478683	0.00644245
NECTIN1	0.00484197	0.00651186
ITGAX	0.00485071	0.00651881
PMAIP1	0.00486578	0.00653425
CD34	0.00495566	0.00665006
CACNB3	0.00512117	0.00686711
NDUFB8	0.00512512	0.00686736
NFKBIA	0.00538076	0.00720026
ITGA4	0.00538146	0.00720026
MAVS	0.00546273	0.00730365
TLR4	0.00562214	0.00751127
TPR	0.00563356	0.00752103
TBXAS1	0.00568114	0.00757901
NUP107	0.00577683	0.00770103
NDUFB1	0.00591117	0.00787437
CD6	0.00593147	0.00789565
IL17A	0.00600976	0.00799403
CXCL16	0.00607059	0.00806907
MECOM	0.00611475	0.00812184
NOS3	0.00612476	0.00812923
IL17RB	0.00615027	0.00815342
ITPK1	0.00615192	0.00815342
GIMAP4	0.00618179	0.00818706
EPHA2	0.00621301	0.00822243
H3-5	0.00634135	0.0083862
CACNA1H	0.00637619	0.00842617
CXCL6	0.00653704	0.00863248
CD68	0.00658647	0.00869148
POLR2D	0.00660564	0.00871048
PLCB4	0.00661132	0.00871166
SPN	0.00664563	0.00875056
SRP54	0.00671228	0.00883195
CDC6	0.00672768	0.00884583
IL3RA	0.00681827	0.00895478
PARP12	0.00682035	0.00895478
ERG	0.0068414	0.00897595
SP1	0.00694265	0.00910226
BLVRA	0.00723891	0.00948385
APOC2	0.00729751	0.00955376
MAPK1	0.00731752	0.0095731
RELB	0.00742889	0.00971184
UTY	0.00763128	0.00996928
SPANXB1	0.00764972	0.00998622
FBP1	0.00784043	0.0102279
C4A/B	0.00787128	0.0102608
BBC3	0.00788445	0.0102706
SMAD2	0.00803725	0.0104622
ACVR1B	0.00812165	0.0105645
HLA-F	0.00815069	0.0105947
FANCL	0.00828297	0.010759
ZBTB20	0.00847247	0.0109973
MAPK3	0.00851554	0.0110454
CD86	0.00880355	0.0114108
TPSB2	0.00906566	0.0117423
NKG7	0.00928686	0.0120202
MCM2	0.00934668	0.0120891
ZNF205	0.00942379	0.0121802
ETV7	0.00954672	0.0123303
STC1	0.00956024	0.0123391
NSD3	0.00957541	0.0123499
RBL2	0.00969714	0.0124981
KRT10	0.00983029	0.0126607
KDM5C	0.0098523	0.0126802
DIPK2B	0.0100402	0.0129123
ITCH	0.0100468	0.0129123
HOXA9	0.0103155	0.0132483
RANBP2	0.0107648	0.0138156
BNIP3L	0.0108149	0.0138701
JAML	0.0108314	0.0138815
FCGR2A	0.0110319	0.0141286
FUT8	0.0111279	0.0142415
IL12RB1	0.0112929	0.0144426
CD3D	0.0115556	0.0147682
MIB1	0.0117093	0.0149541
GPC4	0.0117412	0.0149844
COL4A5	0.0121151	0.0154507
KDR	0.0121329	0.0154627
SSX1	0.0123155	0.0156845
MLLT3	0.0127513	0.0162281
BRD2	0.0130151	0.0165523
TFRC	0.0130407	0.0165733
PPP3CB	0.0132348	0.0167996
WDR76	0.0132372	0.0167996
BRCA1	0.0134237	0.0170244
HNF1A	0.0135761	0.0172059
ASXL1	0.013762	0.0174293
FLT3LG	0.0137853	0.0174425
PKMYT1	0.0137916	0.0174425
ARMH3	0.0138853	0.0175471
IFNAR2	0.0138935	0.0175471
P4HA2	0.0139036	0.0175478
PPP3CA	0.0140373	0.0177043
SLC7A5	0.0140727	0.0177366
ATG16L1	0.0141343	0.0178021
CD3E	0.0142124	0.0178881
CEBPA	0.0144754	0.0182065
CCR7	0.0146016	0.0183525
ARNT	0.0146313	0.0183773
PIM1	0.0147519	0.018516
DLL4	0.0147854	0.0185453
PECAM1	0.0156226	0.0195819
LAMP3	0.0159566	0.0199869
PRKX	0.0159975	0.0200244
TNFSF15	0.0164416	0.0205661
LYN	0.0166403	0.0208004
CCL24	0.0167409	0.0209118
IL17RA	0.0169356	0.0211405
CD74	0.0173139	0.021598
AURKA	0.0176914	0.0220539
DUSP1	0.0177235	0.0220788
TYMS	0.0178893	0.0222701
LAMB3	0.0183227	0.0227941
UQCRQ	0.0184956	0.0229935
SFN	0.018564	0.0230628
CD3G	0.0186163	0.0231121
CCR1	0.0186523	0.0231411
PIK3R3	0.0186771	0.0231561
MERTK	0.0187694	0.0232547
ITGB2	0.0192088	0.0237829
VEGFC	0.0200846	0.0248505
BRD7	0.0209178	0.0258638
MRC1	0.0210557	0.0260168
GPSM3	0.0212062	0.0261849
LAMA5	0.0212594	0.0262328
IRF3	0.0215053	0.0265183
ATRX	0.0217733	0.0268307
CDH5	0.0218184	0.0268681
OAS2	0.0222724	0.0274087
E2F1	0.0223764	0.0275181
MAP2K2	0.022986	0.0282488
VCAM1	0.0234313	0.0287767
IFNGR1	0.024275	0.0297928
CLEC14A	0.0244329	0.0299664
TRBC1/2	0.024509	0.0300396
LRP6	0.0245351	0.0300513
RUNX3	0.0246719	0.0301987
GTF3C1	0.025262	0.0309003
SERINC5	0.0256282	0.0313272
HGF	0.0259701	0.0317238
HERC6	0.0261827	0.0319622
HES1	0.0263836	0.0321859
ID1	0.0264843	0.0322871
TIE1	0.0265844	0.0323875
NOX1	0.0267824	0.032607
CXCL2	0.0271314	0.0330022
SETD2	0.0271432	0.0330022
VEGFA	0.0272509	0.0331112
TOLLIP	0.0273323	0.0331879
CYLD	0.0273801	0.0332239
HLA-C	0.0275125	0.0333624
PIK3CD	0.0278194	0.0337121
MDM4	0.0279412	0.0338372
CXCL9	0.0282897	0.0342366
TRAF2	0.0285664	0.0345486
LRP5	0.0286254	0.0345969
OAS1	0.0286731	0.0346316
PTPRC	0.0288899	0.0348704
HLA-E	0.0290799	0.0350765
GSK3B	0.0297819	0.0358996
BLM	0.0300485	0.0361971
NFKB1	0.0300759	0.0362061
HLA-DOA	0.030168	0.0362931
HELLS	0.0302624	0.0363826
UBE2T	0.0316812	0.0380633
BCL2A1	0.0323805	0.0388779
TTK	0.032623	0.0391434
SLC16A1	0.0331119	0.0397038
MICB	0.0333845	0.0400044
HLA-DRB4	0.0339014	0.0405972
LTB	0.0339514	0.0406304
CD69	0.0340092	0.0406729
LILRB2	0.0344821	0.0412114
IFI16	0.034909	0.0416792
PRKAR1B	0.0349192	0.0416792
UBA7	0.0350182	0.0417701
MAPK8	0.0355381	0.0423625
ALCAM	0.0355799	0.0423847
PLCB1	0.0356543	0.0424456
IL4R	0.0359537	0.0427741
PTCH1	0.0367981	0.0437502
TRAF1	0.0372039	0.0442039
SELE	0.0379731	0.0450885
CD9	0.0381717	0.0452948
BMP4	0.0389063	0.0461364
CUL1	0.0394697	0.0467742
NPM1	0.0396248	0.0469274
SERINC1	0.0401172	0.0474799
TDO2	0.0422938	0.0500235
PSMB10	0.0428976	0.0507047
TAP2	0.0434872	0.0513684
CD14	0.0437688	0.0516424
TRAC	0.0437758	0.0516424
DST	0.0458149	0.0540131
CXADR	0.04651	0.0547972
GNG4	0.0466755	0.0549566
UBB	0.0469733	0.0552716
NFATC3	0.0471328	0.0554236
CCL21	0.0476996	0.056054
NDUFS7	0.0478549	0.0562002
GZMA	0.049912	0.0585514
S100B	0.0499211	0.0585514
MAP2K1	0.0503622	0.0590308
S100A9	0.0504804	0.0591314
CCNB1	0.0511353	0.0598601
PROM1	0.0524614	0.0613731
CDC20	0.053134	0.0621201
C3AR1	0.0542578	0.0633934
HDAC6	0.0543253	0.0634317
EFNA1	0.0544348	0.0635189
ID2	0.054841	0.0639519
MDM2	0.0549408	0.0640274
RORA	0.0549905	0.0640445
EZH2	0.0556498	0.064771
SPRY2	0.0560637	0.0652111
POLB	0.0563736	0.0655298
RFC3	0.0566959	0.0658625
FPR3	0.0568334	0.0659802
TGFBR2	0.0569534	0.0660775
CD37	0.0573603	0.0665074
BRD3	0.0576881	0.066845
SPRY1	0.0584844	0.0677246
ENO1	0.0591236	0.0684214
PUM1	0.0593037	0.0685863
JUN	0.0605389	0.0699706
VHL	0.0609154	0.0703611
PDGFA	0.0615105	0.0710036
IKBKB	0.0621363	0.0716806
MSRB2	0.0633231	0.0730036
HACD2	0.0633845	0.0730283
BMP7	0.0634801	0.0730923
TNFRSF10B	0.064175	0.0738457
GBP4	0.0648542	0.0745803
IKBKE	0.0657189	0.075527
CD83	0.0664195	0.0762841
PPP3R1	0.0668731	0.0767135
RELA	0.0668773	0.0767135
HSP90B1	0.0675898	0.0774821
MYD88	0.0688101	0.0788315
IFIH1	0.0694903	0.0795608
PLK1	0.071636	0.0819172
MAPK9	0.0716383	0.0819172
MMP9	0.0720451	0.0823308
HRAS	0.0722552	0.0825192
CD80	0.0724227	0.0826588
CXCL13	0.0724896	0.0826834
MET	0.073777	0.0840994
SAA1	0.0744712	0.0848376
SMAD9	0.0755727	0.0860388
CREBBP	0.0759754	0.0864434
MCM4	0.0761915	0.0866352
NT5E	0.0762706	0.0866712
A2M	0.0769951	0.08744
CCL2	0.0771143	0.0875209
TNFAIP3	0.0780708	0.0885514
KITLG	0.0790263	0.0895795
C1QA	0.0814373	0.0922552
FYN	0.08159	0.0923708
NDUFA6	0.083036	0.0939496
CEACAM1	0.0835354	0.0944561
CREB1	0.0847205	0.0957368
AURKB	0.0853457	0.0963836
H2AX	0.0873786	0.0986184
HLA-DRB3	0.0887538	0.100109
NBN	0.0892932	0.100655
CMTM4	0.0897	0.101026
CXCL3	0.0897333	0.101026
CXCL12	0.0899692	0.101229
ITGA7	0.091372	0.102744
KIF2C	0.0970559	0.109068
CCR5	0.0976723	0.109693
GLS	0.0984953	0.110492
BAMBI	0.0985041	0.110492
MBNL1	0.0987859	0.11074
TNFRSF10D	0.0991729	0.111057
CLEC7A	0.0991909	0.111057
GNAQ	0.100406	0.112349
TNFRSF25	0.102728	0.114877
RAD50	0.102965	0.115071
GNLY	0.103703	0.115825
PRKAR2A	0.104091	0.116188
MGMT	0.105217	0.117373
JAK2	0.105331	0.117428
MTF2	0.107917	0.120238
MSH2	0.109357	0.121767
SERPINA1	0.10959	0.121953
DLL1	0.110862	0.123292
CD4	0.111446	0.123866
CD200	0.112961	0.125473
CDK6	0.113029	0.125473
DEPTOR	0.115705	0.128366
FLT1	0.11716	0.129901
MLH1	0.118005	0.130758
BCL6B	0.12068	0.133642
MYBL2	0.122196	0.135238
YTHDF2	0.123785	0.136914
STK11	0.124273	0.13737
CCNA2	0.12473	0.137792
RFC4	0.12513	0.13815
FCGRT	0.126233	0.139259
ARID1B	0.126287	0.139259
CMKLR1	0.12908	0.142253
SELENOK	0.129607	0.142689
ABCB1	0.129632	0.142689
PYCARD	0.13185	0.145043
PGF	0.137746	0.151437
MED12	0.139648	0.153436
HSPA1A	0.140876	0.154692
NDUFB7	0.141316	0.155083
HLA-DQA2	0.142193	0.15595
CD2	0.143049	0.156796
GNA11	0.144256	0.158023
ERBB2	0.145426	0.15921
IL22RA1	0.14558	0.159283
NDUFA4L2	0.147317	0.161086
ETV4	0.148361	0.162132
CSF1	0.150187	0.164028
DNMT3A	0.150294	0.164047
LILRB4	0.150452	0.164122
LAIR1	0.158581	0.172885
ADM	0.159194	0.17345
GZMB	0.16265	0.17711
BST2	0.162867	0.177241
ITGA2	0.163669	0.178007
CTSS	0.163801	0.178045
LGALS9	0.169269	0.183878
CDK1	0.17321	0.188048
HLA-DMB	0.173593	0.188352
TNFSF10	0.174021	0.188704
MS4A6A	0.174731	0.189348
RAF1	0.174823	0.189348
RBX1	0.17613	0.190557
POLR2H	0.176202	0.190557
TXNIP	0.176252	0.190557
NCOR1	0.181822	0.196462
TBK1	0.183697	0.198372
KEAP1	0.183932	0.198507
EP300	0.18484	0.19937
KRT19	0.188508	0.203205
ATG5	0.190296	0.205012
FOS	0.191433	0.206115
SAMSN1	0.195114	0.209955
IL6ST	0.195833	0.210604
NF1	0.200301	0.215283
CDH3	0.202639	0.217667
PURA	0.204484	0.21952
KMT2D	0.205145	0.220099
SERINC2	0.206217	0.22112
MAPKAPK2	0.208279	0.223199
C1QB	0.209499	0.224375
LCK	0.210249	0.225047
HLA-DMA	0.210912	0.225624
PTGS2	0.21517	0.230044
NDUFB11	0.215968	0.230762
CSF3R	0.218569	0.233405
CDK2	0.22757	0.242875
TNFRSF1B	0.235024	0.250683
GTF2H3	0.23625	0.251843
PHF6	0.238191	0.253765
SMAD5	0.240092	0.255641
CENPF	0.248023	0.263931
IRF7	0.253527	0.269631
NFKBIZ	0.253756	0.269718
MAP3K5	0.254828	0.270699
NKD1	0.258184	0.274104
CEP55	0.26417	0.280297
ATF2	0.266185	0.282271
BIRC5	0.274661	0.29109
CXXC5	0.275961	0.292297
CCL11	0.27831	0.294615
HCK	0.285075	0.301601
UQCR11	0.287779	0.304286
FOXM1	0.288223	0.304579
CCL22	0.288787	0.304998
WIPF1	0.293138	0.309414
IL15RA	0.29971	0.316168
GADD45A	0.301838	0.318229
IL6	0.313502	0.330336
CNOT2	0.314874	0.331582
HDAC5	0.315048	0.331582
PRDM1	0.315404	0.331765
CCL3	0.318876	0.335224
FANCA	0.320662	0.336907
LFNG	0.328801	0.34526
PSMC4	0.334817	0.351375
CHEK1	0.337205	0.353677
MAPK14	0.340955	0.357406
CD97	0.343693	0.360068
G6PD	0.345238	0.36148
CCR4	0.347233	0.363361
CTLA4	0.351326	0.367432
CD163	0.35697	0.373122
EIF4EBP1	0.363419	0.379645
TBC1D10B	0.366821	0.382979
ATG7	0.36947	0.385524
MELK	0.371849	0.387785
PBRM1	0.374811	0.390651
IL2RA	0.383566	0.399548
PRC1	0.384403	0.400191
IL2RB	0.39889	0.415037
CD58	0.405664	0.421845
IFI35	0.407668	0.423686
ROBO4	0.416398	0.432514
CCND3	0.416828	0.432714
TANK	0.419169	0.434897
ARID1A	0.428731	0.444565
DOCK9	0.433595	0.449353
NLRC5	0.436464	0.45207
PVR	0.439417	0.454619
KRAS	0.439423	0.454619
RASA4	0.448452	0.463697
ATR	0.458326	0.473639
HPRT1	0.459206	0.474279
IRF2	0.461201	0.47607
SLC2A1	0.463666	0.478344
TNFSF11	0.46749	0.482017
JAK3	0.468315	0.482595
KMT2C	0.470131	0.484193
FAS	0.471096	0.484913
DDIT4	0.475349	0.489014
CXCL8	0.495315	0.509267
NFKB2	0.509571	0.52363
LGR5	0.518773	0.532786
ANLN	0.519122	0.532844
CXCL5	0.524663	0.538229
AXIN1	0.527236	0.540565
HLA-DPA1	0.529825	0.542914
SLC25A1	0.559048	0.572538
PDGFB	0.560427	0.573628
APLNR	0.563401	0.576349
CCL4	0.565699	0.578376
PGM2	0.570875	0.583341
WEE1	0.577863	0.590151
RYBP	0.57865	0.590625
HLA-DQA1	0.579557	0.59122
CD53	0.584601	0.596032
HDAC3	0.589661	0.600855
ERCC3	0.595024	0.605981
IDO1	0.606529	0.617354
ATF3	0.612407	0.62299
CSF1R	0.612989	0.623234
MRPL19	0.625123	0.635217
HLA-DQB1	0.638018	0.647959
SMAD4	0.651221	0.661001
BATF	0.652382	0.661811
SPOP	0.675796	0.685182
MSH6	0.698725	0.708036
CXCR4	0.702883	0.711854
NR4A1	0.716329	0.725069
CD40	0.719894	0.728274
SOS2	0.734364	0.742501
ANGPT2	0.736403	0.74415
MME	0.758143	0.765695
FOXP3	0.772852	0.780119
IL1B	0.784925	0.791868
RGMB	0.786916	0.793438
MMRN2	0.791828	0.797949
SMAP1	0.809029	0.814833
TYK2	0.824084	0.829539
CBL	0.827482	0.8325
GUSB	0.827942	0.832504
HLA-DRB5	0.830124	0.834238
SOS1	0.834504	0.838178
SOCS1	0.87386	0.877225
PIK3R1	0.924376	0.927425
BATF3	0.929383	0.931936
GMIP	0.962067	0.964181
ABCF1	0.964775	0.966364
STAT5B	0.991961	0.993049
JAG2	0.995935	0.996481
SFXN1	0.996547	0.996547
