# Supplementary figures and images for: Transcriptomic and immunophenotypic profiling reveals molecular and immunological hallmarks of colorectal cancer tumourigenesis
Source: HighWire-hosted journal article supplement (doi:10.1136/gutjnl-2022-327608), 2022-11-28

Genes of interest from epithelial segment

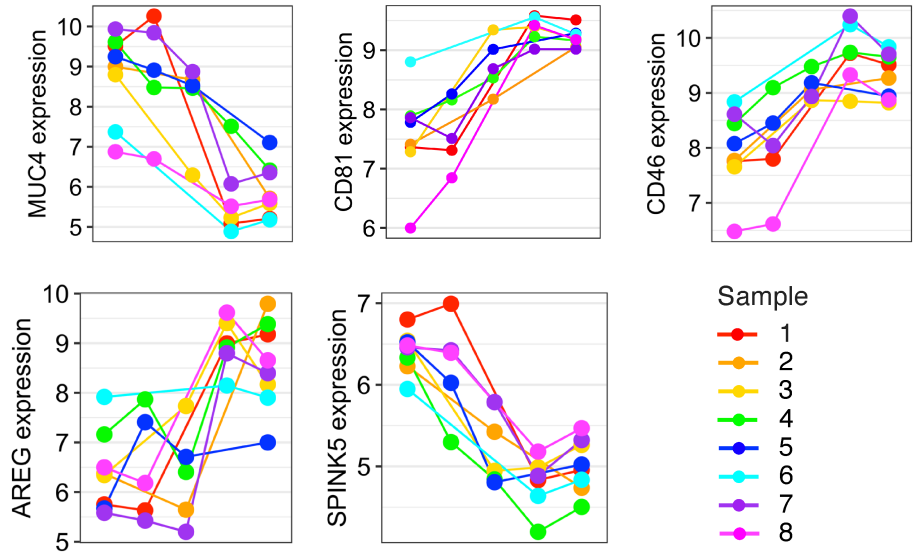

Genes of interest from stromal segment

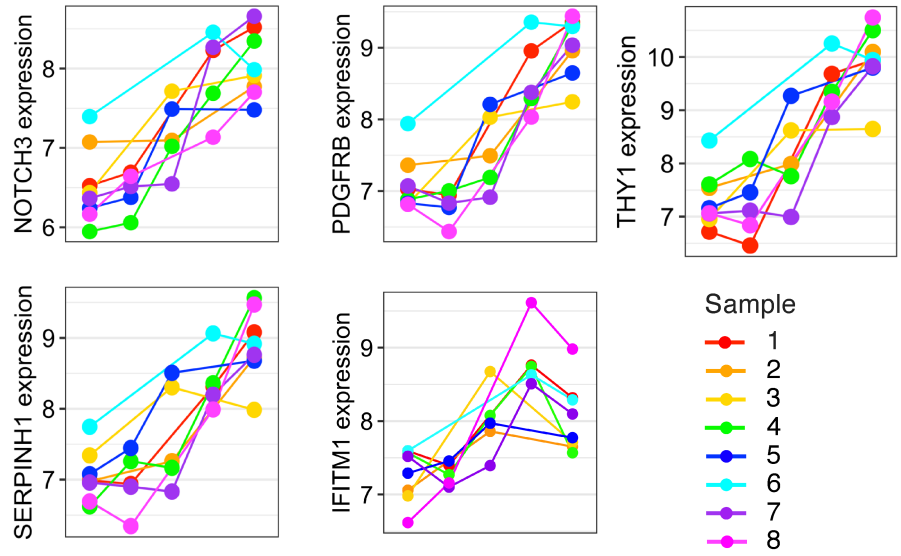

Supplement: gutjnl-2022-327608supp010_data_supplement.pdf [file gutjnl-2022-327608supp010_data_supplement.pdf]
